1  
2  
3  
4  
5  
6  
7  
8  
9  
10  
11  
12  
13  
14  
15  
16  
17  
18  
19  
20

# ***Phytolacca americana* PaGT2 is an ambidextrous polyphenol glucosyltransferase**

Authors:

Rakesh Maharjan<sup>a,b</sup>, Yohta Fukuda<sup>a,b,1</sup>, Naomichi Shimomura<sup>c,1</sup>, Taisuke Nakayama<sup>d,1</sup>, Toru Nakayama<sup>e</sup>, Hiroki Hamada<sup>f</sup>, Tsuyoshi Inoue<sup>a,b</sup>, Shin-ichi Ozaki<sup>c</sup>

Author Affiliation:

<sup>a</sup>Department of Applied Chemistry, Graduate School of Engineering, Osaka University, Suita City, Osaka 565-0871, Japan

<sup>b</sup>Graduate School of Pharmaceutical Science, Osaka University, Suita City, Osaka 565-0871, Japan

<sup>c</sup>Department of Biological Chemistry, Graduate School of Science and Technology for Innovations, Yamaguchi University, Yamaguchi 753-8515, Japan

<sup>d</sup>National Institute of Biomedical Innovation, Health and Nutrition, Saito-Asagi, Ibaraki City, Osaka 567-0085, Japan

<sup>e</sup>Department of Biomolecular Engineering, Graduate School of Engineering, Tohoku University, Sendai, Miyagi 980-8579, Japan

21 <sup>f</sup>Department of Life Science, Faculty of Science, Okayama University of Science, Okayama  
22 700-0005, Japan

23

24 <sup>1</sup>Y.F., N.S., and Taisuke N. contributed equally to this work.

25

26 Author contributions: R.M., Y.F., H.H., T.I., and S.O. designed research; R.M., N.S., and S.O.  
27 performed the assay and analyzed the results; Taisuke N. established protocols for protein  
28 purification and performed preliminary crystallographic analysis; Toru N. contributed cloning  
29 of *PaGT2*; R.M. purified and crystallized proteins; R.M. and Y.F. collected and analyzed  
30 crystallographic data; R.M., Y.F., and S.O. wrote the paper with input from all authors.

31

32 Corresponding author:

33 Hiroki Hamada

34 Department of Life Science, Faculty of Science, Okayama University of Science, Okayama

35 700-005, Japan

36 Phone: +81-86-256-9473

37 E-mail: hamada@dls.ous.ac.jp

38

39 Tsuyoshi Inoue

40 Graduate School of Pharmaceutical Science, Osaka University, 1-6 Yamadaoka, Suita, Osaka

41 565-0871, Japan

42 Phone: +81-6-6879-8209

43 Email: t\_inoue@phs.osaka-u.ac.jp

44

45 Shin-ichi Ozaki

46 Department of Biological Chemistry, Graduate School of Science and Technology for

47 Innovations, Yamaguchi University, Yamaguchi 7753-8518, Japan

48 Email: ozakis@yamaguchi-u.ac.jp

49

50

51 Keywords: Crystal structure | glycosyltransferase | glucosylation | enzymology | piceatannol

## 52 **Abstract**

53 The health benefits of polyphenols have attracted their use as potential therapeutic agents,  
54 food additives, and cosmetics. However, low water solubility of polyphenols limits their cell  
55 absorbability, obscuring further exploration. Glycosylation is known to enhance the solubility  
56 of polyphenols preserving their pharmacological properties. Here, we show that a uridine  
57 diphosphate (UDP) glucosyltransferase from *Phytolacca americana* (*PaGT2*)  
58 regioselectively catalyzes the transfer of glucose from UDP-glucose to stilbenoids such as  
59 piceatannol and flavonoids such as kaempferol. To understand the structure-function  
60 relationship of *PaGT2*, we determined the crystal structure of *PaGT2* as well as *PaGT2*  
61 complexed with donor analogue UDP-2-fluoro glucose and stilbenoid acceptor analogues.  
62 While only one conserved histidine residue is recognized as a catalytic residue in known  
63 UGTs, the crystal structures of *PaGT2* suggested the presence of two catalytically active  
64 residues (His18 and His81) at two sides of the catalytic pocket. Although the single catalytic  
65 residue mutant His18Ala or His81Ala did not completely impair the glucosylation activity of  
66 the enzyme, the double mutant His18Ala/His81Ala failed to form glucoside products. These  
67 results showed that both catalytic residues in *PaGT2* actively and independently catalyze  
68 glucosylation, hence we called *PaGT2* as an ambidextrous UGT. The information from  
69 *PaGT2* will be advantageous for the engineering of efficient biocatalysts for production of  
70 therapeutic polyphenols.

## 71 **Introduction**

72 Glycosylation of secondary metabolites is one of the important mechanism in plants for their  
73 metabolism, intercellular/intracellular localization, and storage (1). Glycosylation of  
74 xenobiotic compounds also play a major role in detoxification system of plants and thereby  
75 minimize the risk of toxic components from the environment (2). Thus, glycosylation of  
76 lipophilic molecules is one of the essential mechanisms for maintaining cellular homeostasis  
77 (3). In plants, the addition of sugar moieties to small molecules is catalyzed by uridine  
78 diphosphate glycosyltransferases (UGTs) which are classified as GT1 family in Carbohydrate  
79 Active Enzyme (CAZy) database (4, 5). Enzymes in this family show catalytic plasticity; that  
80 is, they are able to glycosylate a wide variety of acceptors (9-11) as well as glycosylate a  
81 single acceptor at various available glycosylation sites (12, 13).

82 The UGTs in GT1 family have glycosyltransferase-B (GT-B) fold structures, made up of two  
83 Rossmann fold domains which are connected by a linker (6). Plant GT1 enzymes are  
84 characterized with the presence of consensus sequence known as plant secondary product  
85 glycosyltransferase (PSPG) motif that is involved in recognition of the UDP-sugar donor (7).  
86 The N-terminal domain of these UGTs has a highly conserved histidine which is considered  
87 to be the main catalytic residue (3, 8). The acceptor binding site at the N-terminal domain has  
88 low sequence similarity among UGTs, reflecting a wide spectrum of substrates. However,  
89 only the difference in acceptor binding residues among UGTs is not enough to explain the  
90 substrate plasticity of these enzymes.

91 Polyphenols such as stilbenoids and flavonoids are known to have antioxidant, anti-  
92 estrogenic, anticancer, anti-inflammatory, and cardio-protective effects (14-17), and have  
93 important applications in food, pharmaceuticals, and cosmetics industries (18). Most of these  
94 polyphenols are found to be glycosylated in plants (9, 19) and differences in positions of

95 glycosylation sites can result in different biological activity of glycosides (17). Flavonoid  
96 glucosides such as kaempferol-3-*O*-glucoside and quercetin-3-*O*-glucoside have been  
97 identified in the leaves of *Phytolacca americana*, a toxic plant native to North America (20).  
98 From the roots of this plant, triterpene saponin glucosides have been extracted and  
99 characterized (21). Three glycosyltransferases namely *PaGT1*, *PaGT2*, and *PaGT3* have  
100 been isolated from the callus tissues of *P. americana* (11). Among the three *PaGTs*, *PaGT3*  
101 can glycosylate a wide variety of substrates, such as capsaicin, flavonoids, hydroxyflavones,  
102 and stilbenoids (11, 22, 23). Although *PaGT2* can also regioselectively glucosylate  
103 stilbenoids and flavonoids, the detail has not been much explored.

104 A large number of plant UGT gene sequences have been deposited in database; however,  
105 crystal structures of only few of them are available. These crystal structures of UGTs were  
106 studied for the glycosylation of iso/flavonoids (3, 4, 24) or small molecules, such as  
107 trichlorophenol (25), and indoxyl sulfate (26). Consequently, crystal structures of plant UGT  
108 with stilbenoids are not available. Stilbenoids are more flexible polyphenols compared to  
109 flavonoids and the existing UGT structures would not be sufficient to understand the  
110 mechanism of stilbenoid glycosylation. Hence, to improve our understanding of glycosylation  
111 mechanism and plasticity, crystal structures of more UGTs complexed with their putative  
112 substrates should be determined. In this study we report the crystal structure of apo-*PaGT2*  
113 and *PaGT2* complexed with stilbenoids, such as resveratrol and pterostilbene along with  
114 sugar donor analogue UDP-2-fluoro glucose (UDP-2FGlc). The identification of key residues,  
115 mutational studies, and comparison with other UGT structures provide a basis for  
116 understanding the regioselective glucosylation of acceptors by *PaGT2*.

## 117 **Results**

### 118 **Screening of stilbenoids for glucosylation by *PaGT2***

119 The glucosylation activity of *PaGT2* was determined with UDP-glucose as the glucose donor.  
120 Various stilbenoids and kaempferol (as a representative for flavonoids) were utilized as the  
121 acceptor substrates (Fig. 1, Table 1). Stilbenoids and flavonoids are structurally different  
122 polyphenols. The lack of aromatic ring that bridge ring A and ring B in stilbenoids makes  
123 them more flexible when compared with flavonoids. *PaGT2* transformed piceatannol into  
124 piceatannol 4'-*O*- $\beta$ -glucoside but did not form pterostilbene and rhapointigenin glucosides  
125 despite having molecular frameworks similar to piceatannol (Figs. 1, S2). Even more  
126 surprisingly, *PaGT2* could glucosylate only trace amount of resveratrol that only lacks the  
127 3'OH group compared to piceatannol. Kaempferol was converted to kaempferol 3-*O*- $\beta$ -  
128 glucoside by *PaGT2* although the  $k_{cat}$  value was one quarter of that for piceatannol. The  
129 results indicated piceatannol as the preferred substrate for *PaGT2*. Notably, piceatannol and  
130 kaempferol both have four possible glucosylation sites; however, only one site on each  
131 compound was glucosylated with high regioselectivity. While the 4'OH in piceatannol and  
132 kaempferol seems to be structurally equivalent, only piceatannol 4'-*O*- $\beta$ -glucoside was  
133 formed. To elucidate the molecular basis for this intriguing reactivity of *PaGT2*, we  
134 performed structural analysis as following.

135

### 136 **Structure of *PaGT2* without substrates**

137 The crystal structure of *PaGT2* in its apo form was solved by molecular replacement using  
138 the structure of *Arabidopsis thaliana* UGT72B1 (PDB: 2VCH) (25) as a search model and  
139 refined to 2.30 Å resolution (Fig. S3, SI Table 1). The asymmetric unit contained two *PaGT2*  
140 molecules that were highly similar to each other with overall root mean square deviation

141 (rmsd) of 0.29 Å for overlap of 366 C $\alpha$  atoms. The structure of *PaGT2* belonged to GT-B  
142 fold, made up of two Rossmann ( $\beta/\alpha/\beta$ ) domains (27). The N-terminal domain (residues  
143 Ala5-Ser243) contained central seven parallel  $\beta$ -sheet flanked by eight  $\alpha$ -helices which  
144 include an  $\alpha$ -helix from C-terminal domain, and a small two-stranded  $\beta$ -sheet. The C-terminal  
145 domain (residues Ser252-Gln466) consisted of six  $\beta$ -sheet surrounded by eight  $\alpha$ -helices. The  
146 loop (Gly244-Gly251) that connected the N-terminal domain with the C-terminal domain was  
147 disordered in the structure. *PaGT2* molecules in the asymmetric unit were dimerized by  
148 insertion of a long loop (Val300-Gly328) from the opposite molecules into the acceptor  
149 binding pockets (Fig. S3). The dimerization of *PaGT2* in the crystal structure was an artificial  
150 effect of crystallization (molecular packing, high concentration of protein, effect of  
151 precipitant, etc.) because the enzyme in solution showed a single symmetrical peak  
152 corresponding to its monomeric molecular weight in size exclusion chromatography (SEC)  
153 (Fig. S1). The structure of *PaGT2* also contained a kinked C-terminal helix that crossed over  
154 to N-terminal domain, a characteristic feature of GT-B fold UGT structures (28).

155 *PaGT2* showed the highest sequence similarity of 58% with UGT72B1 (25) and 56% with  
156 *PtUGT1* from *Polygonum tinctorium* (26). The overall structure of *PaGT2* was also highly  
157 similar with the structures of UGT72B1 and *PtUGT1* (PDB: 5NLM) with rmsds of 1.16 Å for  
158 371 C $\alpha$  atoms and 1.03 Å for 373 C $\alpha$  atoms, respectively (Fig. S5A).

159

### 160 **Structure of *PaGT2* with substrates**

161 *PaGT2* was crystallized with donor analogue UDP-2-fluoro-glucose (UDP-2FGlc) and  
162 various acceptors: resveratrol, pterostilbene, piceatannol, 6-hydroxyflavone, and kaempferol.  
163 Diffracting quality crystals of *PaGT2* were obtained only with poor acceptors, resveratrol or  
164 pterostilbene, together with UDP-2FGlc. The diffracting quality crystals of *PaGT2* with good



165 acceptors were difficult to obtain. Similarly, crystallization of *PaGT2* with the donor  
166 substrate UDP-glucose also did not yield well diffracting crystals.

167 The crystal structure of *PaGT2* ternary complex with UDP-2FGlc and resveratrol was refined  
168 to 2.60 Å resolution (Fig. 2A, Table S1). The asymmetric unit of the ternary complex  
169 contained three independent *PaGT2* molecules (Fig. S4A). The loop connecting N- and C-  
170 terminal domains as well as the loop that caused dimerization of apo-*PaGT2* were both  
171 disordered in the structure of complex-*PaGT2* molecules. The overall structures of all the  
172 three molecules were similar with rmsds of 0.46 (chain A and B), 0.56 (chain A and C), and  
173 0.35 Å (chain B and C) for 350, 361, and 358 C $\alpha$  atoms, respectively. The ternary complex  
174 structure of *PaGT2* showed shift in N and C-terminal domains towards the substrates. This  
175 movement upon binding of substrates is a well-known feature of GT-B fold enzymes (Fig.  
176 S5B) (2, 25, 29).

177 The structure of *PaGT2* complexed with UDP-2FGlc and pterostilbene was refined to 2.65 Å  
178 resolution (Fig. S4B, Table S1). The overall structure of this complex was similar to the  
179 structure of *PaGT2* complexed with resveratrol and UDP-2FGlc (rmsd 0.80 Å for 1251 C $\alpha$   
180 atoms).

181

## 182 **Donor binding**

183 UDP-2FGlc was bound in the donor binding pocket on the C-terminal domain of *PaGT2*. The  
184 electron density of UDP-2FGlc was clearly observed in all three molecules in the asymmetric  
185 unit of both complex structures (Figs. 2B, S5). UDP-2FGlc in *PaGT2* was mainly stabilized  
186 by the interaction with residues from the PSPG motif (Figs. 2C, S8C) extending from Trp343  
187 to Gln386 (Fig. S10). The sidechain of Trp343 shifted toward the uracil ring in the UDP-  
188 2FGlc bound structure (Fig. 2C). This highly conserved Trp is observed to flip and form a  $\pi$ -

189 stacking interaction with the uracil ring of UDP-sugar donor in other known UGT structures  
190 (3, 4). However, in the crystal structure of *PaGT2*, the indole ring of Trp343 was not flipped  
191 after binding the donor (Fig. S7) and no such  $\pi$ -stacking interaction was observed. The O4  
192 oxygen and the N3 nitrogen of uracil ring formed hydrogen bond with the main chain  
193 nitrogen and oxygen atoms of Ala344, respectively. The oxygen atoms in the ribose ring  
194 interacted with Glu369. The O2 oxygen and the O3 oxygen on the ribose ring formed  
195 hydrogen bond with Gln346 and Gln242, respectively. Gln242 in complex-*PaGT2* was  
196 observed to move towards UDP-2FGlc as compared to apo-*PaGT2* (Fig. S7). The interaction  
197 between Gln242 and the ribose moiety could be important in *PaGT2* for the stabilization of  
198 the sugar donor. The O1A and the O2A oxygen atoms on  $\alpha$ -phosphate formed hydrogen bond  
199 with Ser366 and His361, respectively. The oxygen atoms O1B and O2B on  $\beta$ -phosphate  
200 interacted with Asn365 and Tyr383, respectively. Gln386 stabilized the 2F fluorine and the  
201 O3 oxygen atoms on the glucose moiety. The O3 and the O4 oxygen atoms of the glucose  
202 ring formed hydrogen bonds with Glu385. The O4 oxygen atom of the glucose also formed  
203 hydrogen bond with the main chain nitrogen of Trp364. Thr137 and Asn365 stabilized the O6  
204 atom on the glucose moiety. The residues that interacted with the sugar donor are highly  
205 conserved among the plant UGTs. The relevance of the residues that interact with the sugar  
206 donor molecule has been studied in different UGTs and has been shown to impair UGTs  
207 upon mutation (2, 3, 25).

208

### 209 **Acceptor binding**

210 The acceptor binding site in N-terminal domain of *PaGT2* was made up mainly of  
211 hydrophobic residues. The crystal structures showed the electron densities for both  
212 resveratrol and pterostilbene in their respective complexes (Figs. 2B, S5). The electron

213 density for resveratrol was clearer in one of the *PaGT2* molecules (chain B) in the  
214 asymmetric unit (Fig. 2B). The electron density for resveratrol in other two *PaGT2* molecules  
215 of the asymmetric unit was observed only for the resorcinol moiety (ring A). The electron  
216 density of pterostilbene was clearer as compared to that of resveratrol (Fig. S6B). However,  
217 the electron densities of phenol moieties (ring B) of pterostilbene were still weaker than the  
218 electron densities of ring A. The electron densities of both resveratrol and pterostilbene  
219 clearly indicated that ring A of stilbenoids occupied the inner space of the acceptor binding  
220 pocket and ring B pointed towards the solvent.

221 The acceptor binding pocket in *PaGT2* was formed by hydrophobic residues Ile85, Leu116,  
222 Phe117, Phe136, Leu146, Val181, Pro183, Leu195, Ala384, and some polar residues His18,  
223 His81, Glu82, Cys142, and Ser138 (Figs. 2D, S7A, S7B). Ring A in stilbenoids were  
224 stabilized mainly by hydrophobic interactions in the interior of the acceptor pocket and  
225 through a CH- $\pi$  stacking interaction with Leu116. Comparison of apo and stilbenoid-complex  
226 *PaGT2* structures showed that the acceptor binding site in apo-*PaGT2* was occupied by  
227 residues from the dimerizing loop. It is noteworthy that the aromatic ring of Phe309 from the  
228 opposite molecule was placed at the position occupied by ring A of stilbenoids in complex-  
229 *PaGT2* (Fig. 2D). Two polar residues Ser138 and Cys142 were at the mean distance of  
230  $3.36 \pm 0.03$  Å and  $4.36 \pm 0.18$  Å, respectively, from the 3OH of resveratrol (SI Table 3). In the  
231 structure with pterostilbene, these residues were at the mean distance of  $4.06 \pm 0.16$  Å and  
232  $4.29 \pm 0.41$  Å from the 3-methoxy group of pterostilbene, which was similar to the case of  
233 resveratrol despite larger size of pterostilbene. While Cys142 was found only in *PaGT2* (Fig.  
234 S10), Ser138 is well conserved among the plant UGTs and is closer to Glu385 instead of the  
235 acceptors. These observations indicated that the acceptors lacked efficient polar interactions  
236 with polar residues of enzyme present at the rear side of the acceptor binding pocket. The  
237 highly conserved catalytic histidine present in plant UGTs was recognized as His18 in

238 *PaGT2*. The sidechain of highly conserved Asp115 was close to His18. The catalytic  
239 histidine removes the proton from glycosylation site of acceptor for nucleophilic attack on C1  
240 carbon of carbohydrate moiety on sugar donor. The conserved aspartate at this position is  
241 considered to interact with catalytic histidine and assist it in abstraction of proton from the  
242 glycosylation site of acceptors (2, 4). In the crystal structures, the mean distance between  
243 His18 and the 4'OH groups on resveratrol and pterostilbene, which corresponded to the  
244 glycosylation site of piceatannol, were observed to be  $5.36 \pm 0.23$  Å and  $6.06 \pm 0.03$  Å,  
245 respectively (SI Table 3). These distances were long for proper hydrogen bonding. Ring B of  
246 stilbenoids were also stabilized by hydrophobic interactions, mainly from Ile85 and Ala384.  
247 The closest polar residue His81 was at the mean distance of  $3.76 \pm 0.21$  Å and  $4.67 \pm 0.82$  Å  
248 from 4'OH of resveratrol and pterostilbene, respectively (SI Table 3). Glu82, positioned next  
249 to His81, was also not suitable for formation of hydrogen bond with these stilbenoids in the  
250 crystal structures. However, His81 and Glu82 could be important for stabilization of  
251 substrates, such as piceatannol and kaempferol. The importance of His81 and Glu82 in  
252 catalysis was elucidated by docking simulation for piceatannol and kaempferol in the *PaGT2*  
253 structure (Fig. 3). As was observed in the crystal structures with stilbenoids, His81 was closer  
254 to 4'OH of modeled piceatannol compared to the conserved catalytic residue His18 (SI Table  
255 4). In contrast, His18 was closer to the 3OH glucosylation site in modeled kaempferol than  
256 His81, while H81 could interact with 4'OH also in kaempferol. The docking result also  
257 suggested that Glu82 could form a hydrogen bond with 3'OH in piceatannol and be close to  
258 the O1 oxygen in kaempferol. Indeed, polar residues at corresponding position were reported  
259 in other UGTs, such as Gln84 in *VvGT1*(2) and Glu88 in *PtUGT1*(26), stabilized the  
260 respective acceptor molecules by forming a hydrogen bond. Thus, residues located around the  
261 outer surface of the acceptor binding site are thought to be involved in the stabilization of  
262 substrates. Contrary, due to the lack of 3'OH group on ring B, resveratrol and pterostilbene

263 would have weaker hydrogen bonding interactions than piceatannol, resulting in the flexible  
264 structures of stilbenoids in the acceptor binding pocket. The weak stabilization of these  
265 stilbenoids could be the reason for their negligible glucosylation and poor electron density of  
266 ring B in the crystallographic data.

267

## 268 **Mutagenesis studies**

269 In order to confirm the involvement of the residues in catalysis and substrate recognition,  
270 *PaGT2* mutants were prepared and their glucosylation activities were evaluated. The residues  
271 that were assumed to directly interact with the acceptors were mutated for the mutational  
272 study. The list of *PaGT2* mutants and their glucosylation activity data are listed in Table 1.  
273 For the functional assay, piceatannol was used as the representative stilbenoid as wild type  
274 (WT) *PaGT2* had very low activity with other stilbenoids. Functional assays were also  
275 conducted with kaempferol to determine the difference between the glucosylation of  
276 stilbenoids and flavonoids.

277 The substitution of Cys142 with a smaller alanine residue increased the  $K_m$  value by 1.7-fold  
278 but did not decrease the  $k_{cat}$  value for the production of piceatannol 4'-*O*- $\beta$ -glucoside. The  $K_m$   
279 value of the Cys142Ala mutant towards kaempferol was comparable with the WT *PaGT2*,  
280 while the  $k_{cat}$  value was increased by about 40%. Moreover, the Cys142Ala mutant  
281 transformed kaempferol not only to kaempferol 3-*O*- $\beta$ -glucoside but also a small amount of  
282 other glucosides, indicating the importance of Cys142 in regioselective glucosylation of  
283 kaempferol. The substitution of Cys142 with a smaller amino acid residue appeared to afford  
284 space for ring A of piceatannol/kaempferol. The slight increase in acceptor binding pocket  
285 could have allowed other conformations of kaempferol, that were not possible in WT *PaGT2*,  
286 and resulted in production of side products.

287 We also constructed His81Ala and Glu82Ala mutants to examine the role of these residues in  
288 glucosylation. For piceatannol glucosylation, both of these mutants exhibited lower  $k_{\text{cat}}$  and  
289 higher  $K_{\text{m}}$  values than the WT *PaGT2*, which indicated their involvement in the efficient  
290 formation of the Michaelis complex. In the case with kaempferol, the  $K_{\text{m}}$  value for  
291 kaempferol glucosylation was nearly double with the His81Ala mutant. The  $K_{\text{m}}$  value for  
292 kaempferol glucosylation by the Glu82Ala mutant was comparable to the WT enzyme but  
293 this mutant lost regioselectivity with slight increase in the total  $k_{\text{cat}}/K_{\text{m}}$  value. These results  
294 indicated that both His81 and Glu82 were also involved in the glucosylation of kaempferol.

295 To somewhat surprise, the His18Ala mutant retained glycosylation activity for both  
296 piceatannol and kaempferol although His18 was the conserved catalytic residue. For both  
297 piceatannol and kaempferol glucosylation, the  $K_{\text{m}}$  value was not affected significantly by the  
298 mutation of His18 to Ala. The  $k_{\text{cat}}$  value for piceatannol glucosylation by the His18Ala  
299 mutant was 30% of the WT enzyme. This mutant had low regioselectivity and hence  
300 produced a mixture of several kaempferol glucosides; however, the total catalytic efficiency  
301 was comparable with WT *PaGT2*. We also prepared a mutant deleting 31 N-terminal residues  
302 (*PaGT2* $\Delta$ 31), which lacked the conserved histidine (His18). This mutant was able to  
303 glucosylate piceatannol as with the His18Ala mutant. The piceatannol glucosylation activity  
304 of  $\Delta$ 31 mutant was low compared to His18Ala mutant (Fig. S9) presumably because the N-  
305 terminal deletion could have distorted the structure of enzyme and affected its activity. In  
306 order to identify the residue that catalyzed the glucosylation reaction in His18Ala and  $\Delta$ 31  
307 mutants, we generated the His18Ala/His81Ala double mutant *PaGT2*, taking the proximity of  
308 His81 towards 4'OH of acceptors in crystal structures and formation of piceatannol 4'-*O*- $\beta$ -  
309 glucoside into considerations. The enzyme assay showed that the His18Ala/His81Ala mutant  
310 lost the ability to generate glucosides with both piceatannol and kaempferol. These results  
311 indicated that His81 could be another residue in *PaGT2* that could catalyze the glucosylation.

312

## 313 **Discussion**

314 *PaGT2*, a glycosyltransferase from *P. americana*, can glucosylate structurally different  
315 polyphenols: stilbenoids and flavonoids (Figs. 1, S2). For the structure-function relationship  
316 of *PaGT2* we determined the crystal structures of *PaGT2* with and without stilbenoids and  
317 UDP-2FGlc. The stilbenoids in *PaGT2* structures are placed in the highly hydrophobic  
318 acceptor binding pocket with ring B pointing outward of the cavity (Fig. 2D). The part of  
319 stilbenoids lying in the interior of acceptor binding pocket is stabilized mainly by van der  
320 Waals interactions and CH- $\pi$  stacking interaction with Leu116. The distance between  
321 acceptors and Cys142 in the crystal structure is long for effective hydrogen bonding.  
322 However, the mutation of Cys142 to Ala showed an increase in the  $K_m$  for piceatannol  
323 glucosylation and loss in regioselectivity of kaempferol glucosylation, indicating its role in  
324 substrate binding. The interaction of enzyme with ring B of substrates in the crystal structures  
325 is weaker. This is due to lack of polar groups in resveratrol/pterostilbene other than 4'OH on  
326 ring B. In the case of piceatannol or kaempferol, acceptors are stabilized by His81 and Glu82.  
327 In fact, the docking model of piceatannol in *PaGT2* indicates that Glu82 could form a  
328 hydrogen bond with 3'OH of piceatannol (Fig. 3A). The mutation of Glu82 to Ala reduces the  
329  $k_{cat}$  value to around 30% of WT *PaGT2* and increases the  $K_m$  value for piceatannol  
330 glucosylation, supporting the hypothesis that Glu82 stabilizes ring B of piceatannol. Also,  
331 mutation of His81 to Ala severely affected both the  $K_m$  and  $k_{cat}$  values for piceatannol  
332 glucosylation. Thus, the low activity of *PaGT2* towards resveratrol and pterostilbene is due to  
333 weak stabilization of these substrates in the acceptor binding pocket, whereas the presence of  
334 methoxy group on 4' position on rhapontigenin prevented its glucosylation. The docking  
335 model of kaempferol indicates Glu82 and His81 are also important for the stabilization of  
336 kaempferol (Fig. 3B). The  $K_m$  value for kaempferol glucosylation is almost double in the

337 His81Ala mutant although the catalytic efficiency is not affected. Glu82 is likely to interact  
338 with O1 oxygen in kaempferol and stabilize it in the active site. The Glu82Ala mutant affords  
339 a mixture of kaempferol glucosides including the 3-*O*- $\beta$ -glucoside. This suggests that Glu82  
340 stabilizes kaempferol in a particular single conformation in the active site for high  
341 regioselective glucosylation of kaempferol. The loss of interaction between O1 oxygen in  
342 kaempferol and Glu82 could have allowed different conformations of kaempferol in the  
343 active site resulting into its poor regioselective glucosylation. These observations suggest that  
344 the residues at position 81 and 82 can make contact with ring C and B of flavonoids, such as  
345 kaempferol, to stabilize them in the active site.

346 Plant UGTs are usually characterized by the presence of a conserved catalytic pair. In *PaGT2*  
347 the conserved catalytic pair corresponds to His18 and Asp115. However, the His18Ala  
348 mutant still shows 30% activity with piceatannol and comparable activity with kaempferol to  
349 produce piceatannol 4'-*O*- $\beta$ -glucoside and a mixture of kaempferol glucosides, respectively.  
350 Mutation of the conserved histidine in *VvGT1* (His20) (2), *UGT85H2* (His21) (4), and  
351 *PtUGT1* (His26) (26) are reported to result in complete loss of enzyme activity. Another GT  
352 from *P. americana*, *PaGT3*, also loses the glycosylation activity when the conserved  
353 histidine (His20) is mutated to Ala or Asp (22). Moreover, the *PaGT2* $\Delta$ 31 mutant, which  
354 lacks His18, can glucosylate piceatannol (Fig. S9). It is reported that in a UGT purified from  
355 the root of *G. max* (*GmIF7GT*) lacks 49 N-terminal residues including the conserved catalytic  
356 histidine, but can glycosylate its substrate (30). Noguchi *et al.* assumed the presence of the  
357 second catalytic residue in *GmIF7GT* though it was not identified due to the lack of structural  
358 information of the enzyme. Therefore, it can be deduced that *PaGT2* possesses another active  
359 residue that can catalyze glucosylation of the substrates in the absence of His18. The crystal  
360 structures of *PaGT2* as well as the docking of piceatannol show that His81, compared to  
361 His18, is closer to the glucosylation site (4'OH) in stilbenoids (Figs. 2D, 3A). Although this



362 His81 is not the conserved catalytic residue, it is possible that the residue is involved in  
363 glucosylation of the substrates especially in the His18Ala mutant as well as in the  $\Delta$ 31 mutant.  
364 The role of His81 in catalysis is confirmed by the His18Ala/His81Ala double mutant PaGT2,  
365 which shows no glucosylation activity with both piceatannol and kaempferol.

366 The enzyme assay of individual His18Ala and His81Ala mutants show that His18 is the main  
367 catalytic residue for the production of piceatannol 4'-*O*- $\beta$ -glucoside and kaempferol-3-*O*- $\beta$ -  
368 glucoside (Fig. 3). The increase in the  $K_m$  value for glucosylation of both acceptors show that  
369 His81 is involved more in acceptor binding than catalysis. From the enzyme assay data,  
370 although His18 is the main catalytic residue for piceatannol glycosylation, it can be assumed  
371 that PaGT2 utilizes both His18 and His81 independently for regioselective catalysis (Table 1).  
372 For the regioselective kaempferol glucosylation, His18 is the main catalytic residue as both  
373 WT and His81Ala has comparable  $k_{cat}/K_m$  values and forms only kaempferol-3-*O*- $\beta$ -glucoside.  
374 His81 can be considered as a secondary catalytic residue for kaempferol glucosylation when  
375 His18 is absent in the active site or when kaempferol binds in conformations different from  
376 that in the WT docking model (Fig. 3B). Thus, His81 could have catalyzed the kaempferol  
377 glucosylation to produce a mixture of glucosides including kaempferol-3-*O*- $\beta$ -glucoside in  
378 the His18Ala mutant. These facts suggest that not only His18 but also His81 is the catalytic  
379 residue in PaGT2.

380 The studies on plant UGTs are getting broader for the production of dyes, therapeutics, and  
381 cosmetics. Our study provides the insights into the catalytic mechanism on one of the non-  
382 canonical polyphenol UGTs. The crystal structures of PaGT2 complexed with  
383 resveratrol/pterostilbene shed light on the regioselective glycosylation of therapeutically  
384 valuable stilbenoids and flavonoids. Moreover, the identification of His81 as an alternative  
385 catalytic residue in PaGT2 could be one example for how plant UGTs have evolved their  
386 catalytic strategies to adapt a large variety of substrates appearing in the course of changes in

387 their environment. The involvement of His81 in catalysis is also useful to explain the  
388 plasticity of UGTs, namely why some UGTs can glycosylate similar substrates at different  
389 positions or produce more than one glycosides with single substrate. Our results will provide  
390 a basis for the development of tailored biocatalyst for the efficient glycosylation of  
391 polyphenols for therapeutic and cosmetic uses.

## 392 **Materials and methods**

### 393 **Expression, purification, and enzyme assay**

394 The *PaGT2* gene was cloned into a pCold vector and expressed in *E. coli* BL21 star (DE3).

395 The recombinant protein was purified by using standard metal affinity chromatography

396 followed by anion exchange chromatography. Size exclusion chromatography (SEC) was

397 employed as the final purification step. The protein was then concentrated in the SEC buffer

398 (20 mM Tris-HCl pH 8.0, 100 mM NaCl, 5mM DTT) to 15-20 mg/ml for crystallization.

399 *PaGT2* mutants for enzyme assay were expressed and purified using following same

400 protocols.

401 UGT activity of *PaGT2* and mutants were assayed in 50 mM potassium phosphate buffer pH

402 7.4 at 37°C as described in (20). The reaction mixtures were analyzed by HPLC both for

403 determination of products and for the determination of catalytic constants.

404 Detailed protocols of expression, purification, and enzyme assay are given in SI text.

405

### 406 **Crystallization, data collection, and crystal structure determination**

407 Details of crystallization and data collection are given in SI text. The structure of apo *PaGT2*

408 was solved by molecular replacement using *A. thaliana* UGT72B1 (PDB: 2VCH) as a search

409 model using Molrep in CCP4 (31). Structure of *PaGT2* complexes were solved using the

410 apo-*PaGT2* structure as a search model. Model building and refinement were performed

411 using COOT (32) and refmac5 (33) in CCP4. Figures were prepared using PyMOL (34) and

412 LigPlot+ (35).

413

### 414 **Molecular docking**

415 Molecular docking of piceatannol and kaempferol were performed using automatic docking

416 program PyRx Virtual Screening tool (36). The crystal structure of *PaGT2* in complex with

417 UDP-2FGlc and resveratrol was used as reference. Default parameters were used for  
418 controlling the docking process.

419 **Acknowledgements**

420 The authors wish to thank Dr. K. Fujimoto, Fuji molecular planning co., ltd. for the synthesis  
421 of UDP-2FGlc. The authors thank the beamline staffs for their support during data collection  
422 on BL44XU at SPring-8 under proposal Nos. 2017A6745, 2017B6745, 2018A6844, and  
423 2018B6844. This work was partly supported by Grant-in-Aid for Young Scientists (B)  
424 17K17862 for YF, Grant-in-Aid for Scientific Research (B) 18H02004 for TI, and Grant-in-  
425 Aid for Scientific Research (C) 17K05933 for SO.

426 **References**

- 427 1. Suzanne P, Birger LM, Soren B (2003) On the origin of family 1 plant glycosyltransferases.  
428 *Phytochemistry* 62:399-413.
- 429 2. Offen W, *et al.* (2006) Structure of a flavonoid glucosyltransferase reveals the basis for  
430 plant natural product modification. *EMBO J* 25(6):1396-1405.
- 431 3. Bowles D, Isayenkova J, Lim EK, Poppenberger B (2005) Glycosyltransferases: Managers  
432 of small molecules. *Curr Opin Plant Biol* 8 (3 SPEC. ISS.):254-263.
- 433 4. Li L, *et al.* (2007) Crystal Structure of *Medicago truncatula* UGT85H2 - Insights into the  
434 Structural Basis of a Multifunctional (Iso)flavonoid Glycosyltransferase. *J Mol Biol*  
435 370(5):951-963.
- 436 5. Lombard V, *et al.* (2014) The carbohydrate-active enzymes database (CAZy) in 2013.  
437 *Nucleic Acids Res* 42(D1):490-495.
- 438 6. Coutinho PM, Deleury E, Davies GJ, Henrissat B (2003) An evolving hierarchical family  
439 classification for glycosyltransferases. *J Mol Biol* 328(2):307-317.
- 440 7. Ross J, Li Y, Lim EK, Bowles DJ (2001) Higher plant glycosyltransferases. *Genome Biol*  
441 2(2):REVIEWS3004.
- 442 8. Modolo L V, *et al.* (2009) Crystal Structures of Glycosyltransferase UGT78G1 Reveal the  
443 Molecular Basis for Glycosylation and Deglycosylation of (Iso)flavonoids. *J Mol Biol*  
444 392(5):1292-1302.
- 445 9. Katja H, *et al.* (2017) Glucosylation of smoke-derived volatiles in grapevine (*Vitis*  
446 *vinifera*) is catalyzed by a promiscuous resveratrol/guaiacol glucosyltransferase. *J Agric Food*  
447 *Chem* 65:5681-5689.

- 448 10. Longhai D, *et al.* (2017) Exploiting the aglycon promiscuity of glycosyltransferase Bs-  
449 YjiC from *Bacillus subtilis* and its application in synthesis of glycosides. *J Biotech* 248:69-  
450 76.
- 451 11. Noguchi A, *et al.* (2009) Identification of an inducible glycosyltransferase from  
452 *Phytolacca americana* L. cells that are capable of glucosylating capsaicin. *Plant Biotechnol*  
453 26(3):285-292.
- 454 12. Hui S, *et al.* (2005) Crystal Structures of a Multifunctional Triterpene/Flavonoid  
455 Glycosyltransferase from *Medicago truncatula*. *The Plant Cell* 17:3141-3154.
- 456 13. Adam MC, Lim EK, Colin K, Bowels DJ (2008) A Kinetic Analysis of Regiospecific  
457 Glucosylation by Two Glycosyltransferases of *Arabidopsis thaliana*. *J Biol Chem*  
458 283(23):15724-15731.
- 459 14. Akinwumi BC, Bordun KAM, Anderson HD (2018) Biological activities of stilbenoids.  
460 *Int J Mol Sci* 19(3):1-25.
- 461 15. Ross JA, Kasum CM (2002) Dietary Flavonoids: Bioavailability, Metabolic Effects, and  
462 Safety. *Annu Rev Nutr* 22(1):19-34.
- 463 16. Quideau S, Deffieux D, Douat-Casassus C, Pouységue L (2011) Plant polyphenols:  
464 Chemical properties, biological activities, and synthesis. *Angew Chemie - Int Ed* 50(3):586-  
465 621.
- 466 17. Hosoda R, *et al.* (2013) Differential Cell-Protective Function of Two Resveratrol (Trans -  
467 3, 5, 4' -trihydroxystilbene) Glucosides against Oxidative Stress. 344:124-132.
- 468 18. Dirks-Hofmeister ME, Verhaeghe T, De Winter K, Desmet T (2015) Creating Space for  
469 Large Acceptors: Rational Biocatalyst Design for Resveratrol Glycosylation in an Aqueous  
470 System. *Angew Chemie - Int Ed* 54(32):9289-9292.

- 471 19. LuziaVM, *et al.* (2009) Crystal structures of glycosyltransferase UGT78G1 reveal the  
472 molecular basis for glycosylation and deglycosylation of (iso)flavonoids. *J. Mol. Biol.*  
473 392:1292-1302.
- 474 20. Iwakiri T, *et al.* (2013) Glucosylation of hydroxyflavones by glucosyltransferases from  
475 *Phytolacca americana*. *J Mol Catal B Enzym* 90:61-65.
- 476 21. Wang L, *et al.* (2008) Bioactive triterpene saponins from the roots of *Phytolacca*  
477 *americana*. *J Nat Prod* 71(1):35-40.
- 478 22. Ozaki S, *et al.* (2012) Regioselective glucosidation of trans-resveratrol in *Escherichia coli*  
479 expressing glucosyltransferase from *Phytolacca americana*. *Biotechnol Lett* 34(3):475-481.
- 480 23. Uesugi D, *et al.* (2017) Synthesis, oxygen radical absorbance capacity, and tyrosinase  
481 inhibitory activity of glycosides of resveratrol, pterostilbene, and pinostilbene. *Biosci*  
482 *Biotechnol Biochem* 81(2):226-230.
- 483 24. Hiromoto T, *et al.* (2015) Structural basis for acceptor-substrate recognition of UDP-  
484 glucose: Anthocyanidin 3-O-glucosyltransferase from *Clitoria ternatea*. *Protein Sci*  
485 24(3):395-407.
- 486 25. Brazier-Hicks M, *et al.* (2007) Characterization and engineering of the bifunctional N-  
487 and O-glucosyltransferase involved in xenobiotic metabolism in plants. *Proc Natl Acad Sci*  
488 104(51):20238-20243.
- 489 26. Hsu TM, *et al.* (2018) Employing a biochemical protecting group for a sustainable indigo  
490 dyeing strategy. *Nat Chem Biol.* 14(3):256-261.
- 491 27. Mulichak AM, Losey HC, Walsh CT, Garavito RM. (2001) Structure of the UDP-  
492 glucosyltransferase GtfB that modifies the heptapeptide aglycone in the biosynthesis of  
493 vancomycin group antibiotics. *Structure* 9(7):547-557.



- 494 28. Gibson RP, *et al.* (2004) The donor subsite of trehalose-6-phosphate synthase: Binary  
495 complexes with udp-glucose and udp-2-deoxy-2-fluoro-glucose at 2 Å resolution. *J Biol*  
496 *Chem* 279(3):1950-1955.
- 497 29. Chang A, Singh S, Phillips GN, Thorson JS (2011) Glycosyltransferase structural biology  
498 and its role in the design of catalysts for glycosylation. *Curr Opin Biotechnol* 22(6):800-808.
- 499 30. Noguchi A, *et al.* (2007) A UDP-glucose:Isoflavone 7-O-glucosyltransferase from the  
500 roots of soybean (*Glycine max*) seedlings: Purification, gene cloning, phylogenetics, and an  
501 implication for an alternative strategy of enzyme catalysis. *J Biol Chem* 282(32):23581-  
502 23590.
- 503 31. Winn MD, *et al.* (2011) Overview of the CCP4 suite and current developments. *Acta*  
504 *Crystallogr Sect D Biol Crystallogr* 67(4):235-242.
- 505 32. Emsley P, Lohkamp B, Scott WG, Cowtan K. (2010) Features and development of Coot.  
506 *Acta Crystallogr Sect D Biol Crystallogr* 66(4):486-501.
- 507 33. Murshudov G, Vagin A, Dodson E. (1997) Refinement of Macromolecular Structures by  
508 the Maximum Likelihood method. *Acta Crystallogr Sect D Biol Crystallogr* 53:240-255.
- 509 34. Schrodinger LLC. The PyMOL Molecular Graphics System, Version 1.8. 2015.
- 510 35. Wallace AC, Laskowski RA, Thornton JM. (1995) Ligplot - a Program To Generate  
511 Schematic Diagrams of Protein Ligand Interactions. *Protein Eng* 8(2):127-134.
- 512 36. Dallakyan S, Olson AJ (2015) Small molecule library screening by docking with PyRx.  
513 *Methods Mol Biol* 1263, 243-250.

514 **Figure legends**

515 **Fig. 1. Panel of acceptors used for glucosylation study and HPLC analysis of products.**

516 (A) Schematic diagram of reaction catalyzed by *PaGT2* (B) Other compounds screened for  
517 glucosylation by *PaGT2*. The names of aglycones are colored where green and orange mean  
518 good and poor acceptor, respectively, and red shows that the molecules were not catalyzed by  
519 *PaGT2*. (C) HPLC analysis of glucosylation reaction catalyzed by *PaGT2* with UDP-glucose  
520 and substrates; i. resveratrol, ii. piceatannol, and iii. kaempferol. Peaks obtained for substrate  
521 and products in chromatograms are indicated. Blue and black lines show chromatograms  
522 before and after the reactions, respectively.

523 **Fig. 2. The structure of *PaGT2* and its interaction with the substrates.** (A) Structure of  
524 *PaGT2* complexed with resveratrol (orange) and UDP-2FGlc (yellow). (B) Sigma-A-  
525 weighted  $2Fo-Fc$  electron density maps contoured at  $1\sigma$  for resveratrol and UDP-2FGlc in  
526 chain B of *PaGT2* complexed with resveratrol and UDP-2FGlc. (C) Residues involved in  
527 binding UDP-2FGlc in complex *PaGT2* chain B (green) compared with corresponding  
528 residues in apo-*PaGT2* (magenta). (D) Residues involved in binding resveratrol in complex  
529 *PaGT2* chain B (green) compared with corresponding residues in apo-*PaGT2* (magenta). The  
530 4'OH group on resveratrol (analogous to glucosylation site on piceatannol) is indicated with  
531 blue (\*). Phenylalanine (F309) from the opposite molecule occupying the acceptor pocket is  
532 in grey color and labelled bold with underline.

533 **Fig. 3. Docking and mutational analysis.** (A, B) Conformation of (A) piceatannol and (B)  
534 kaempferol in *PaGT2* from docking model prepared by software PyRx. Glucosylation sites  
535 are indicated with \*. (C, D) The result from glucosylation activity and HPLC profile of  
536 *PaGT2* mutants for (C) piceatannol and (D) kaempferol is shown. For kaempferol, blue

537 bars/arrow indicate the glucosylation product kaempferol-3-*O*- $\beta$ -glucoside and grey

538 bars/arrow indicate other glucoside products.

539 **Table 1: Kinetic data of *PaGT2* and mutants**

| Enzyme ( <i>PaGT2</i> ) | Acceptor                | $K_m$ ( $\mu\text{M}$ ) | $k_{\text{cat}}$ ( $\text{s}^{-1}$ )          | $k_{\text{cat}}/K_m$ ( $\text{M}^{-1} \text{s}^{-1}$ ) |
|-------------------------|-------------------------|-------------------------|-----------------------------------------------|--------------------------------------------------------|
| WT                      | Piceatannol             | $29 \pm 2^*$            | $1.46 \times 10^{-2} \pm 1.16 \times 10^{-3}$ | $505.74 \pm 53$                                        |
| H18A                    |                         | $20 \pm 3$              | $4.50 \times 10^{-3} \pm 6.67 \times 10^{-4}$ | $225.00 \pm 47$                                        |
| H81A                    |                         | $52 \pm 3$              | $8.66 \times 10^{-3} \pm 1.83 \times 10^{-3}$ | $166.66 \pm 36$                                        |
| E82A                    |                         | $40 \pm 3$              | $4.33 \times 10^{-3} \pm 1.16 \times 10^{-3}$ | $108.33 \pm 30$                                        |
| C142A                   |                         | $49 \pm 2$              | $2.16 \times 10^{-2} \pm 1.66 \times 10^{-3}$ | $442.17 \pm 38$                                        |
| H18A/H81A               |                         | N.D.                    | N.D.                                          | N.D.                                                   |
| WT                      | Kaempferol <sup>†</sup> | $33 \pm 7$              | $3.66 \times 10^{-3} \pm 3.33 \times 10^{-4}$ | $111.11 \pm 25$                                        |
| H18A                    |                         | $26 \pm 4$              | $3.50 \times 10^{-3} \pm 1.67 \times 10^{-4}$ | $137.42 \pm 25$                                        |
| H81A                    |                         | $64 \pm 5$              | $6.16 \times 10^{-3} \pm 1.66 \times 10^{-3}$ | $96.35 \pm 27$                                         |
| E82A                    |                         | $40 \pm 2$              | $6.17 \times 10^{-3} \pm 1.36 \times 10^{-4}$ | $157.99 \pm 7$                                         |
| C142A                   |                         | $41 \pm 2$              | $5.16 \times 10^{-3} \pm 1.17 \times 10^{-4}$ | $127.65 \pm 4$                                         |
| H18A/H81A               |                         | N.D.                    | N.D.                                          | N.D.                                                   |
| WT                      | Resveratrol             | N.D.                    | N.D.                                          | N.D.                                                   |
| WT                      | Pterostilbene           | N.D.                    | N.D.                                          | N.D.                                                   |
| WT                      | Rhapointigenin          | N.D.                    | N.D.                                          | N.D.                                                   |

540

541 \* Data are presented by means  $\pm$  SEM (standard error of the mean, n = 3).

542 † Kinetic parameters for kaempferol determined for overall glucoside products. The H18A,

543 E82A and C142A mutants produced a mixture of glucosides including kaempferol 3-O- $\beta$ -

544 glucoside.

545 **Figures**

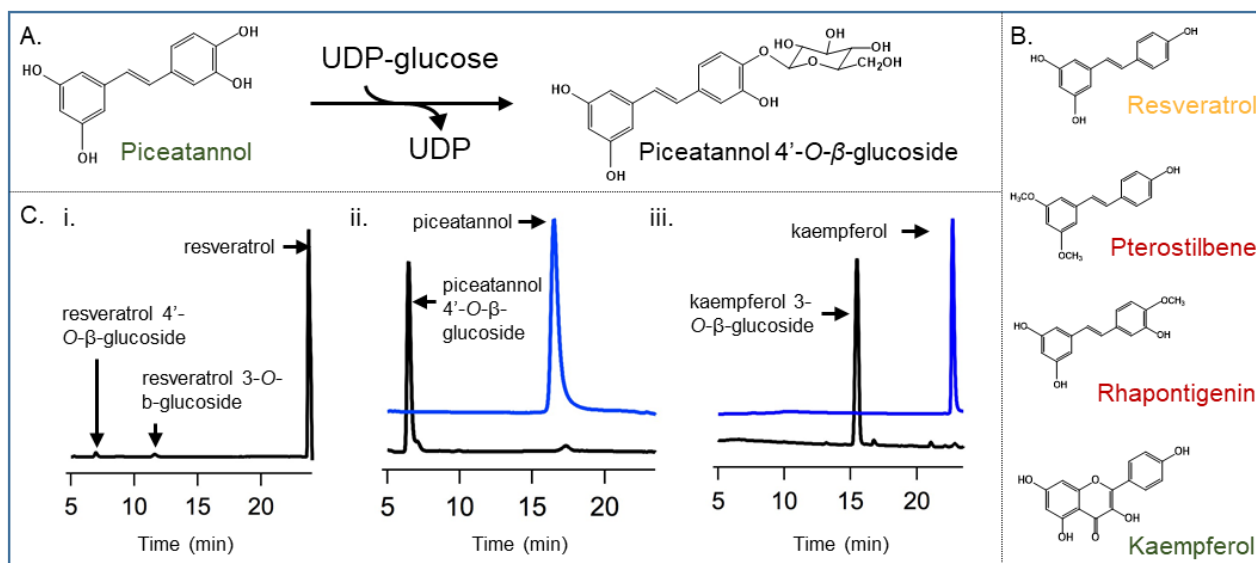

546 **Fig. 1. Panel of acceptors used for glucosylation study and HPLC analysis of products.**

547 (A) Schematic diagram of reaction catalyzed by *PaGT2* (B) Other compounds screened for

548 glucosylation by *PaGT2*. The names of aglycones are colored where green and orange mean

549 good and poor acceptor, respectively, and red shows that the molecules were not catalyzed by

550 *PaGT2*. (C) HPLC analysis of glucosylation reaction catalyzed by *PaGT2* with UDP-glucose

551 and substrates; i. resveratrol, ii. piceatannol, and iii. kaempferol. Peaks obtained for substrate

552 and products in chromatograms are indicated. Blue and black lines show chromatograms

553 before and after the reactions, respectively.

554

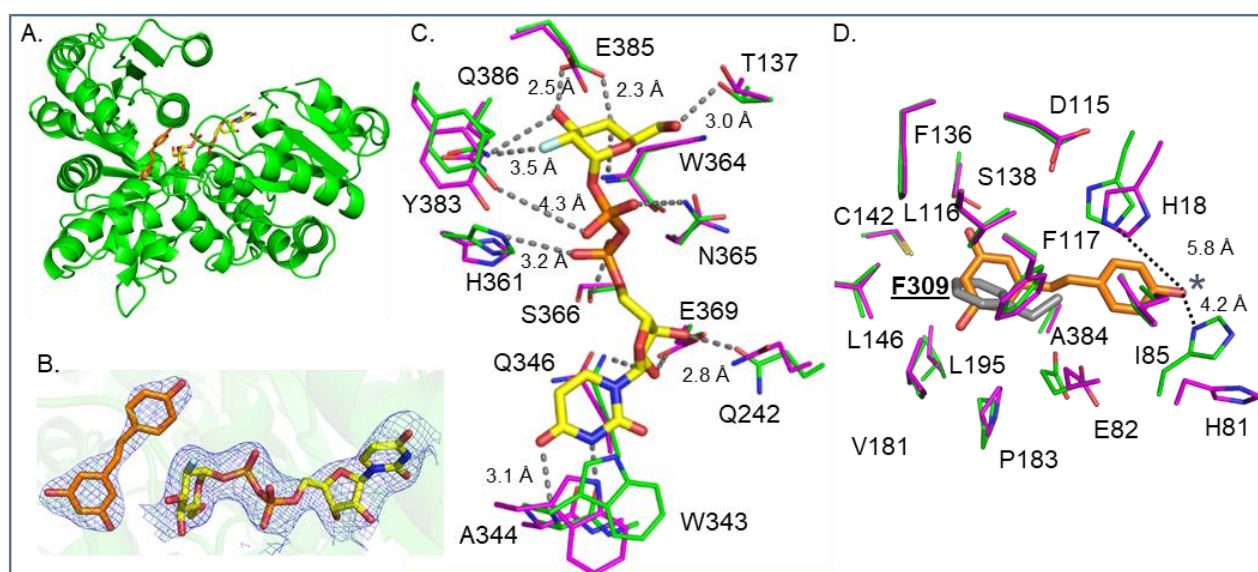

555 **Fig. 2. The structure of *PaGT2* and its interaction with the substrates.** (A) Structure of  
556 *PaGT2* complexed with resveratrol (orange) and UDP-2FGlc (yellow). (B) Sigma-A-  
557 weighted  $2Fo-Fc$  electron density maps contoured at  $1\sigma$  for resveratrol and UDP-2FGlc in  
558 chain B of *PaGT2* complexed with resveratrol and UDP-2FGlc. (C) Residues involved in  
559 binding UDP-2FGlc in complex *PaGT2* chain B (green) compared with corresponding  
560 residues in apo-*PaGT2* (magenta). (D) Residues involved in binding resveratrol in complex  
561 *PaGT2* chain B (green) compared with corresponding residues in apo-*PaGT2* (magenta). The  
562 4'OH group on resveratrol (analogous to glucosylation site on piceatannol) is indicated with  
563 blue (\*). Phenylalanine (F309) from the opposite molecule occupying the acceptor pocket is  
564 in grey color and labelled bold with underline.

565

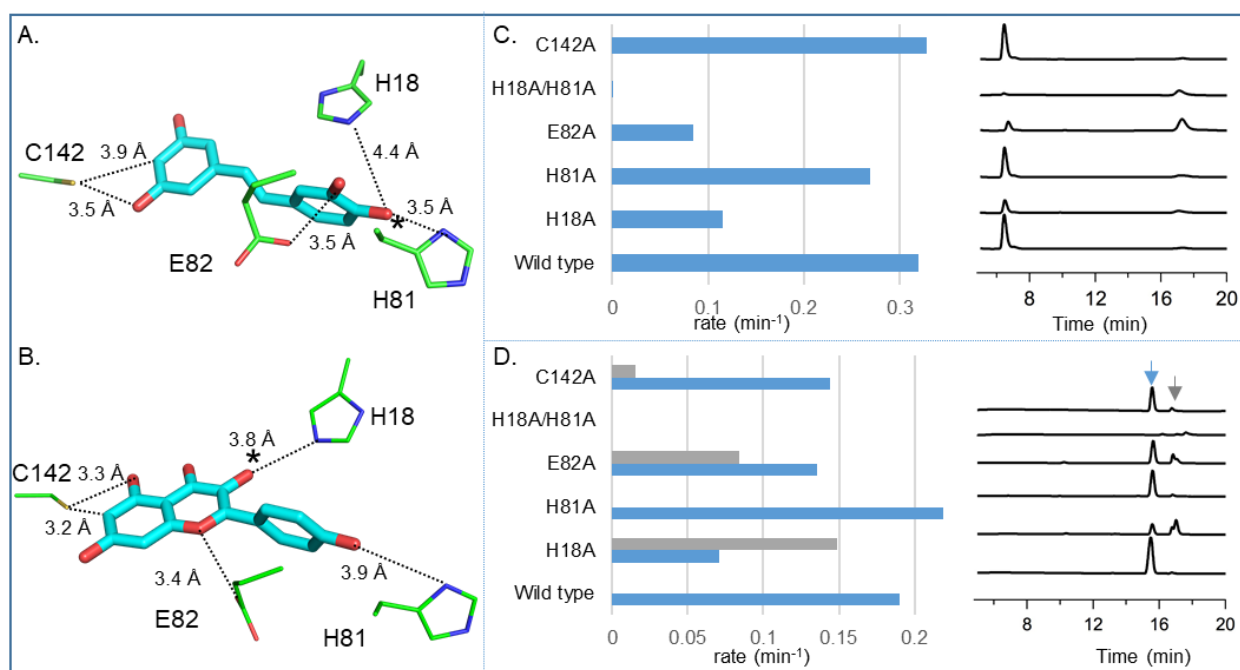

566 **Fig. 3. Docking and mutational analysis.** (A, B) Conformation of (A) piceatannol and (B)  
567 kaempferol in *PaGT2* from docking model prepared by software PyRx. Glucosylation sites  
568 are indicated with \*. (C, D) The result from glucosylation activity and HPLC profile of  
569 *PaGT2* mutants for (C) piceatannol and (D) kaempferol is shown. For kaempferol, blue  
570 bars/arrow indicate the glucosylation product kaempferol-3-*O*- $\beta$ -glucoside and grey  
571 bars/arrow indicate other glucoside products.

572

573 **Supplementary information**

574 **SI Text**

575 **Materials and methods**

576 **Expression and purification of *PaGT2***

577 *PaGT2* cDNA and pCold vector were amplified by polymerase chain reaction (PCR) using  
578 following primers:

579 pCold forward 5'-TAGGTAATCTCTGCTTAAAAGCACAG-3', pCold reverse 5'-  
580 ACCCTGGAAATAAAGATTCTCC-3' *PaGT2* forward 5'-  
581 CTTTATTTCAGGGTATGGAAATGGAAGCACCCTC-3' and *PaGT2* reverse 5'-  
582 AGCAGAGATTACCTAGCTTTTGCATTGGCTCCATTTAG-3'.

583 Amplified *PaGT2* cDNA was cloned into pCold vector using Infusion kit (Takara Bio USA,  
584 Inc.) following the kit manufacturer's protocol. The construct contained N-terminal 6x  
585 histidine tag followed by TEV protease recognition site. A single colony of BL21 star (DE3),  
586 transformed with pCold *PaGT2*, was inoculated into 2 ml LB medium supplemented with  
587 100 µg/ml ampicillin and grown at 37 °C for about 8 hours as starter culture. 200 µl of the  
588 starter culture was introduced into 200 ml LB medium with same concentration of antibiotics  
589 and grown overnight at 37 °C. This culture was used to inoculate 1 L culture in the same  
590 medium in the next morning and the cells were continued to grow at 37 °C. When the OD<sub>600</sub>  
591 was ~0.4, the temperature was decreased to 15 °C. Expression was induced with isopropyl-β-  
592 D-thiogalactopyranoside (IPTG) at 15 °C and OD<sub>600</sub> ~0.6-0.8. After 24 hours, cells were  
593 harvested by centrifugation at 9000 ×g for 10 min at 4 °C. Harvested cells were frozen with  
594 liquid nitrogen and stored at -80 °C until its use.

595 The cell pellet was re-suspended in buffer-A (20 mM Tris-HCl pH 8.5, 100 mM NaCl, 5 mM  
596 DTT) including 1 tablet of protease inhibitor cocktail (Roche). Cells were lysed by sonication  
597 on ice with the following pulse sequence: 15 sec burst, 15 sec rest for a total burst time of 10



598 min at a power output of 80. Lysed cells were subjected to centrifugation at 20,000 ×g for 30  
599 min at 4 °C. The obtained supernatant was filtered using a 0.45 µm membrane syringe filter.  
600 The filtered supernatant was loaded on to a Ni-NTA column (HisTrap HP 5 ml) equilibrated  
601 with buffer- A. The column was washed with 10 column volume (CV) of buffer- A. *PaGT2*  
602 was eluted with a 0-50% gradient of buffer-A supplemented with 300 mM imidazole.  
603 Fractions containing *PaGT2* were pooled, mixed with TEV protease and dialyzed overnight  
604 against buffer-A to remove histidine tag. Dialyzed sample was diluted 10 times using 20 mM  
605 Tris-HCl pH 8.5 and loaded on to a HiTrap Q (5 ml) column equilibrated with 20 mM Tris-  
606 HCl pH 8.5. *PaGT2* was eluted with a linear gradient ranging from 0 to 1 M NaCl in 20 mM  
607 Tris-HCl pH 8.5. Fractions containing *PaGT2* were pooled, concentrated using Vivaspin and  
608 loaded on to Hiload 16/60 Superdex 200 pg size exclusion chromatography (SEC) column  
609 equilibrated with SEC buffer (20 mM Tris-HCl pH 8.0, 100 mM NaCl, 5 mM DTT).  
610 Fractions containing *PaGT2* were pooled, concentrated, and stored at -80 °C.

611

### 612 **Site-directed mutagenesis**

613 Site-directed mutagenesis was performed using the whole plasmid pCold-*PaGT2* and specific  
614 oligonucleotide primers listed in SI Table 2. Briefly, the whole plasmid was linearized with  
615 mutagenesis primers by PCR. Amplified PCR products were treated with DpnI (New  
616 England Biolabs) and purified using NucleoSpin® Gel and PCR Clean-up (MACHEREY-  
617 NAGEL), following the manufacturer's protocol. Purified PCR product were ligated using T4  
618 polynucleotide kinase (Toyobo co.) and ligation high ver. 2.0 (Toyobo co.), and transformed  
619 into *E. coli* DH5α. The desired mutation of *PaGT2* was confirmed by DNA sequencing.

620

621 **Enzyme assay**

622 WT *PaGT2* and all mutants for enzyme assay were expressed and purified as mentioned  
623 above. The glucosylation reactions were performed at 37°C in a 200 µl total reaction volume  
624 containing 50 mM potassium phosphate buffer (pH 7.4), 50 µM acceptor substrates, 100 µM  
625 UDP-glucose, and 5 µM enzyme was incubated at 37°C for 10 minutes. The reaction was  
626 stopped by adding 1.5% trifluoroacetic acid, centrifuged at 12,000 rpm for 1 minute and  
627 filtered using dsmic-13HP. HPLC analysis of the reaction mixtures was performed on Imtakt  
628 US-C18 (2.0 × 150 mm) reverse-phase column at a flow rate of 0.2 mL/min. Piceatannol and  
629 resveratrol glucosylation mixtures were analyzed by isocratic elution, starting with 15%  
630 acetonitrile and 85% water for 20 minutes followed by 100% acetonitrile for 10 minutes.  
631 Rhapontigenin glucosylation mixtures were also analyzed by isocratic elution, starting with  
632 50% acetonitrile and 50% water for 30 minutes followed by 100% acetonitrile for 10 minutes.  
633 Kaempferol glucosylation products were eluted by a linear gradient of acetonitrile starting  
634 from 10% acetonitrile and 90 % water to 30% acetonitrile and 70 % water in 20 minutes  
635 followed by 100% acetonitrile for 10 minutes. Pterostilbene glucosylation products were also  
636 eluted using a linear gradient of 50% acetonitrile and 50% water to 100% acetonitrile in 30  
637 minutes followed by 100% acetonitrile for 10 minutes. The reaction products were identified  
638 by comparing retention times of peaks with those of authentic glucosides. To quantitate  
639 glucoside products in the reaction mixture, standard curves were generated. For enzyme  
640 kinetic studies, acceptor concentrations were varied (25-150 µM). The hyperbolic  
641 dependence of glucoside production rates on acceptor concentrations was fitted using the  
642 Michaelis–Menten equation to determine  $k_{cat}$  and  $K_m$ .

643

644 **Protein crystallization**

645 Crystallization screening of *PaGT2* with and without resveratrol and UDP-2FGlc were  
646 performed by the sitting drop vapor diffusion method from 100 nl/100 nl mixture of protein  
647 stock (15 mg/ml in 20 mM Tris-HCl pH 8.0, 100 mM NaCl, 5 mM DTT) and well solution.  
648 Apo *PaGT2* was crystallized using well solution containing 0.1 M magnesium formate, 0.1  
649 M MOPS pH 7.0, and 17% w/v PEG 3350 at 20 °C. Optimal crystals for diffraction were  
650 achieved by micro-seeding and hanging drop vapor diffusion from 1  $\mu$ l/1  $\mu$ l protein to  
651 reservoir solution. Crystals were harvested in same reservoir solution supplemented with 15%  
652 ethylene glycol and flash cooled in liquid nitrogen.

653 Complexes of *PaGT2* with UDP-2FGlc and resveratrol/pterostilbene was co-crystallized in  
654 the presence of 5 mM UDP-2FGlc and 2 mM resveratrol/pterostilbene in ethanol, mixed 1:1  
655 with a well solution containing 0.11 M potassium citrate, 0.06 M lithium citrate, 0.11 M  
656 sodium phosphate, and 23-25% w/v PEG 6000 by hanging drop vapor diffusion. Crystals  
657 were harvested in same reservoir solution supplemented with 15% xylitol and flash cooled in  
658 liquid nitrogen.

659

#### 660 **Data collection and crystal structure determination**

661 Diffraction data were collected on beamline BL44XU at SPring8 with an MX300HE CCD  
662 detector (Rayonix, LLC) and an EIGER X 16M detector (Dectris). Data for apo-*PaGT2* was  
663 collected to 2.30 Å. *PaGT2* complexed with UDP-2FGlc acceptors resveratrol and  
664 piceatannol were collected to 2.60 Å and 2.65 Å, respectively. X-ray diffraction data were  
665 indexed and scaled using HKL2000 (1) or XDS (2). Structure of apo *PaGT2* was solved by  
666 molecular replacement using *A. thaliana* UGT72B1 (PDB: 2VCH) as a search model using  
667 Molrep in CCP4. Structure of *PaGT2* complexes were solved using the solved apo-*PaGT2* as  
668 a search model. Model building, and refinement were performed using COOT and refmac5,  
669 as mentioned previously.

670

671 **References**

- 672 1. Otwinowski Z, Minor W (1997) Processing of X-ray diffraction data collected in  
673 oscillation mode. *Methods Enzymol* 276:307-326.
- 674 2. Kabsch W. (2010) XDS *Acta Crystallogr Sect D Biol Crystallogr* 66(2):125-132.
- 675 3. Robert X, Gouet P (2014) Deciphering key features in protein structures with the new  
676 ENDscript server. *Nucl Acids Res* 42(W1): W320-W324.

677

678 **SI Table 1: Data collection and refinement**

|                                                             | <i>PaGT2</i> (apo)                | <i>PaGT2</i> + resveratrol +<br>UDP-2FGlc | <i>PaGT2</i> +<br>pterostilbene +<br>UDP-2FGlc |
|-------------------------------------------------------------|-----------------------------------|-------------------------------------------|------------------------------------------------|
| <b>Data collection</b>                                      |                                   |                                           |                                                |
| X-ray source                                                | SPring-8<br>BL44XU                | SPring-8<br>BL44XU                        | SPring-8<br>BL44XU                             |
| Detector                                                    | Rayonix MX300HE                   | Rayonix MX300HE                           | EIGER X 16M                                    |
| Wavelength (Å)                                              | 0.9                               | 0.9                                       | 0.9                                            |
| Space group                                                 | $P2_12_12_1$                      | $P2_12_12_1$                              | $P2_12_12_1$                                   |
| Cell dimensions<br><i>a, b, c</i> (Å)<br><i>α, β, γ</i> (°) | 91.6 94.8 115.2<br>90.0 90.0 90.0 | 57.3 137.6 208.9<br>90.0 90.0 90.0        | 56.7 136.8 205.1<br>90.0 90.0 90.0             |
| Resolution (Å)                                              | 50.00-2.30 (2.34-<br>2.30) *      | 50.00-2.60 (2.64-2.60)                    | 50.00-2.65 (2.74-<br>2.65)                     |
| Total reflections                                           | 335208                            | 349853                                    | 311499                                         |
| Unique reflections                                          | 45171 (2216)                      | 51665 (2535)                              | 47340 (4530)                                   |
| $R_{\text{merge}}^{\dagger}$ (%)                            | 7.2 (95.9)                        | 8.6 (>100)                                | 7.1 (>100)                                     |
| $R_{\text{meas}}^{\ddagger}$ (%)                            | 7.8 (103.0)                       | 4.0 (51.4)                                | 7.7 (>100)                                     |
| $I/\sigma(I)$                                               | 28.5 (2.2)                        | 25.9 (1.5)                                | 15.7 (2.0)                                     |
| $CC_{1/2}^{\S}$                                             | (0.757)                           | (0.689)                                   | (0.694)                                        |
| Completeness (%)                                            | 99.9 (100.0)                      | 99.0 (100.0)                              | 99.8 (98.6)                                    |
| Redundancy                                                  | 7.4 (7.5)                         | 6.8 (7.2)                                 | 6.6 (6.7)                                      |
| <b>Refinement</b>                                           |                                   |                                           |                                                |
| Resolution (Å)                                              | 36.64-2.30 (2.36-<br>2.30)        | 44.85-2.60 (2.66-2.59)                    | 49.68-2.65 (2.71-<br>2.65)                     |
| $R_{\text{work}}/R_{\text{free}}$ (%)                       | 21.99/25.11<br>(30.5/35.0)        | 21.57/25.13 (33.4/36.9)                   | 23.77/25.80<br>(37.7/35.0)                     |
| RMSD bond length (Å)                                        | 0.0058                            | 0.0129                                    | 0.0139                                         |
| RMSD bond angles (°)                                        | 1.0341                            | 1.3768                                    | 1.3926                                         |
| Ramachandran plot (%)                                       |                                   |                                           |                                                |
| Favored                                                     | 98.44                             | 98.53                                     | 98.37                                          |
| Allowed                                                     | 1.56                              | 1.47                                      | 1.63                                           |
| Outliers                                                    | 0.00                              | 0.00                                      | 0.00                                           |
| Average <i>B</i> -factor (Å <sup>2</sup> )                  |                                   |                                           |                                                |
| Protein                                                     |                                   | 79.32                                     | 86.55                                          |
| Water                                                       | 51.27                             |                                           |                                                |
| UDP-2FGlc                                                   | 47.71                             | 78.63                                     | 84.72                                          |
| Resveratrol/Pterostilbene                                   |                                   | 128.08                                    | 116.43                                         |
| Molprobity score                                            | 1.30                              | 1.44                                      | 1.49                                           |
| Molprobity clash score<br>(percentile)                      | 4.81 (99 <sup>th</sup> )          | 8.14 (99 <sup>th</sup> )                  | 4.63 (99 <sup>th</sup> )                       |
| PDB ID                                                      | 6JEL                              | 6JEM                                      | 6JEN                                           |

679

680 Note: \* Values in parentheses are for the highest resolution shell.

681 †  $R_{\text{merge}} = \sum_{hkl} \sum_i |I_i(hkl) - \langle I(hkl) \rangle| / \sum_{hkl} \sum_i I_i(hkl)$

682 ‡  $R_{\text{meas}} = \sum_{hkl} \{N(hkl) / [N(hkl)-1]\}^{1/2} \times | \sum_{hkl} \sum_i |I_i(hkl) - \langle I(hkl) \rangle| / \sum_{hkl} \sum_i I_i(hkl)$ , where  $I_i(hkl)$  is

683 the intensity of the  $i^{\text{th}}$  observation of reflection  $(hkl)$  and  $N$  is the redundancy.

684 §  $CC_{1/2} = (\sigma_y^2 - 1/2 \sigma_\epsilon^2) / (\sigma_y^2 + 1/2 \sigma_\epsilon^2)$ , where,  $\sigma_y^2$  the variance of the average intensities across

685 the unique reflections of a resolution shell and,  $\sigma_\epsilon^2$  the average of all sample variances of the

686 averaged (merged) intensities across all unique reflections of a resolution shell.

687

688

689

690

691

692

693

694

695

696

697

698

699

700

701 **SI Table 2: Forward primers used for mutagenesis of *P aGT2***

| Mutant | Primers | Primer sequences                          |
|--------|---------|-------------------------------------------|
| H18A   | Forward | 5'- atgggc <b>gcg</b> ctcatccccta -3'     |
|        | Reverse | 5'- tccagggcttggaaactatgactatgagtgg -3'   |
| H81A   | Forward | 5'- gtggcc <b>gcg</b> gaggtcacaatctcc -3' |
|        | Reverse | 5'- gccgtcaggtaaatgggccgggtc -3'          |
| E81A   | Forward | 5'- gtggcccac <b>gcg</b> gtcacaatctcc -3' |
|        | Reverse | 5'- gccgtcaggtaaatgggccgggtc -3'          |
| C142A  | Forward | 5'- gctatg <b>gc</b> attgctctcctttt -3'   |
|        | Reverse | 5'- cgtggatgtgaaatacaagtaagggtg -3'       |

702

703 Note: Codon for the mutant residues are indicated with bold letters

704

705 **SI Table 3: Distance between acceptors and polar residues of enzyme in designated**  
 706 **chain in the acceptor binding site of *PaGT2***

| Acceptor                                                                          | Distance between                   | Chain A<br>(Å) | Chain B<br>(Å) | Chain C<br>(Å) | Mean±SEM*   |
|-----------------------------------------------------------------------------------|------------------------------------|----------------|----------------|----------------|-------------|
| 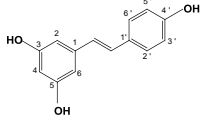 | His18 (NE2) - 4'OH                 | 5.0            | 5.8            | 5.3            | 5.36 ± 0.23 |
|                                                                                   | His81 (ND1) - 4'OH                 | 3.5            | 4.2            | 3.6            | 3.76 ± 0.21 |
|                                                                                   | Glu82 (OE2) - 4'OH                 | 5.6            | 7.1            | 7.2            | 6.63 ± 0.51 |
|                                                                                   | Ser138 (OG) - 3OH                  | 3.4            | 3.4            | 3.3            | 3.36 ± 0.03 |
|                                                                                   | Cys142 (SG) - 3OH                  | 4.6            | 4.0            | 4.5            | 4.36 ± 0.18 |
|  | His18 (NE2) - 4'OH                 | 6.0            | 6.1            | 6.0            | 6.06 ± 0.03 |
|                                                                                   | His81 (ND1) - 4'OH                 | 4.9            | 3.7            | 5.3            | 4.67 ± 0.82 |
|                                                                                   | Glu82 (OE2) - 4'OH                 | 8.7            | 7.9            | 7.9            | 8.25 ± 0.46 |
|                                                                                   | Ser138 (OG) -<br>3OCH <sub>3</sub> | 4.1            | 4.1            | 3.8            | 4.06 ± 0.16 |
|                                                                                   | Cys142 (SG) -<br>3OCH <sub>3</sub> | 4.5            | 4.5            | 3.8            | 4.29 ± 0.41 |

707

708 \*SEM: standard error of the mean. The distances between Nε of His, Oγ of Ser, Sγ of Cys,

709 Oε of Glu and O of 4'OH/3OH/3OCH<sub>3</sub> in acceptors are measured.



710 **SI Table 4: Distance between acceptors and polar residues of *Pa*GT2 in the docking**

711 **model**

| Acceptor                                                                                                | Distances between* | Distance (Å) |
|---------------------------------------------------------------------------------------------------------|--------------------|--------------|
| <b>Piceatannol</b><br>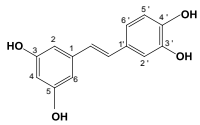 | His18 (NE2) - 4'OH | 4.4          |
|                                                                                                         | His81 (ND1) - 4'OH | 3.5          |
|                                                                                                         | Glu82 (OE2) - 3'OH | 3.5          |
|                                                                                                         | Ser138 (OG) - 3OH  | 4.4          |
|                                                                                                         | Cys142 (SG) - 3OH  | 3.5          |
| <b>Kaempferol</b><br>  | His18 (NE2) - 3OH  | 3.8          |
|                                                                                                         | His81 (ND1) - 4'OH | 3.9          |
|                                                                                                         | Glu82 (OE2) - 1O   | 3.4          |
|                                                                                                         | Ser138 (OG) - 5OH  | 3.8          |
|                                                                                                         | Cys142 (OS) - 5OH  | 3.3          |

712

713 \*The distances between Nε of His, Oγ of Ser, Sγ of Cys, Oεof Glu and O of 4'OH/3OH in

714 acceptors are measured.

715 **SI figures**

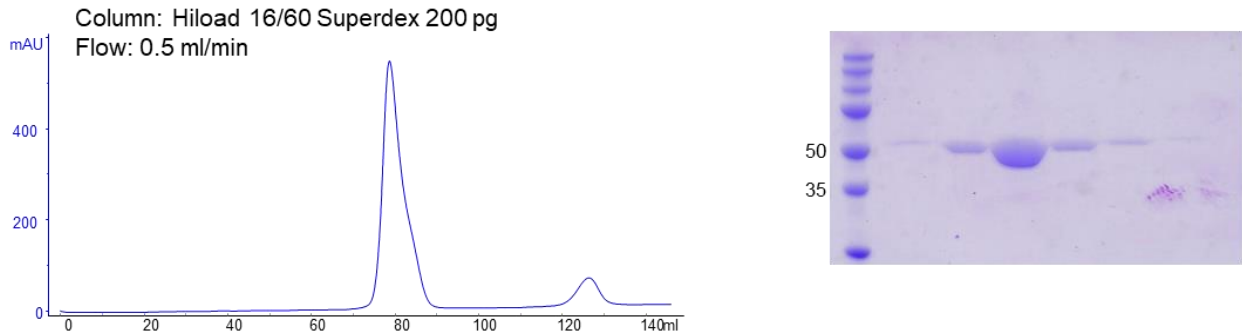

716

717 **S1. PaGT2 is monomer in solution.** (A) Size exclusion chromatography (SEC) profile of  
718 PaGT2. The single peak obtained in the chromatogram suggests that the enzyme is monomer  
719 in solution. (B) SDS-PAGE of PaGT2 after SEC. The theoretical molecular mass of purified  
720 PaGT2 is 51.3 kDa.

721

722

723

724

725

726

727

728

729

730

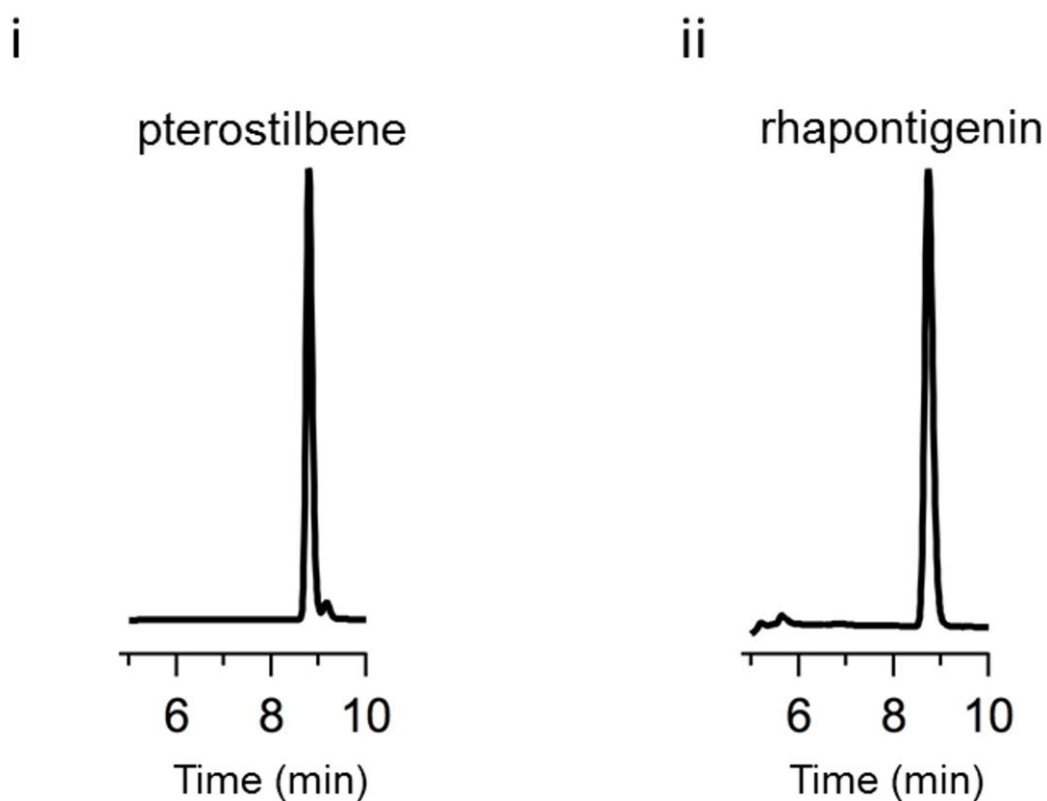

731

732 **S2. HPLC analysis of aglycones glucosylation by *PaGT2*.** HPLC analysis of i.  
733 pterostilbene and ii. rhapontigenin indicated that these are not substrates for glucosylation by  
734 *PaGT2*.

735

736

737

738

739

740

741

742

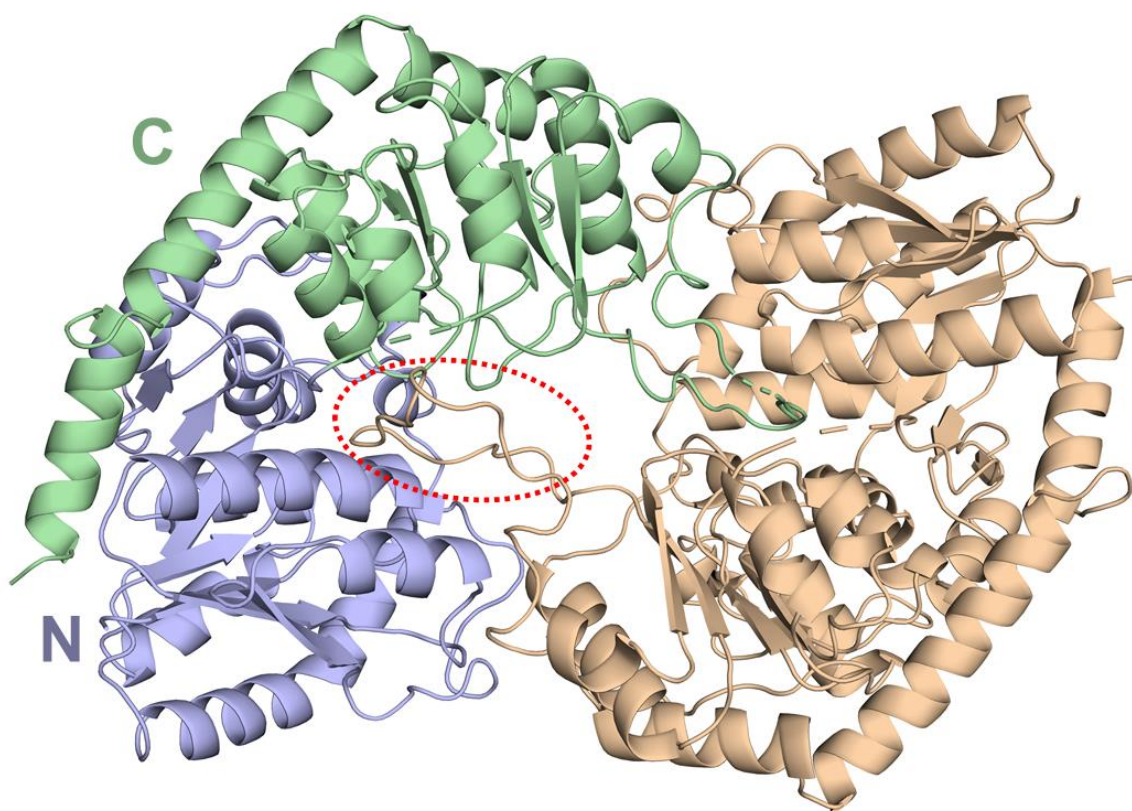

743

744 **S3. Overall structure of apo-*PaGT2*.** There are two *PaGT2* molecules in the asymmetric  
745 unit dimerized by insertion of the loop (marked with red oval). The N-terminal (light-blue)  
746 and C-terminal (green) domains are indicated in one of the molecule.

747

748

749

750

751

752

A.

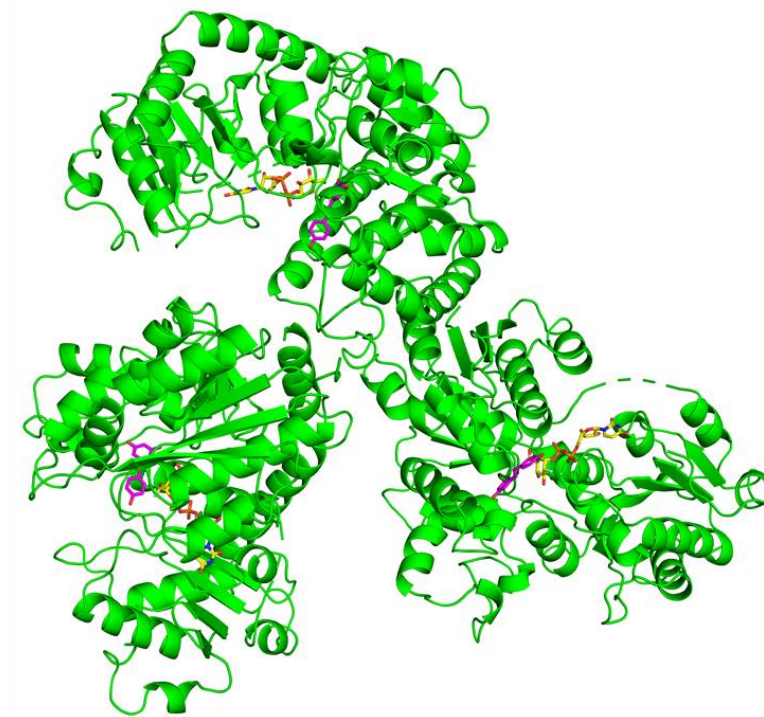

B.

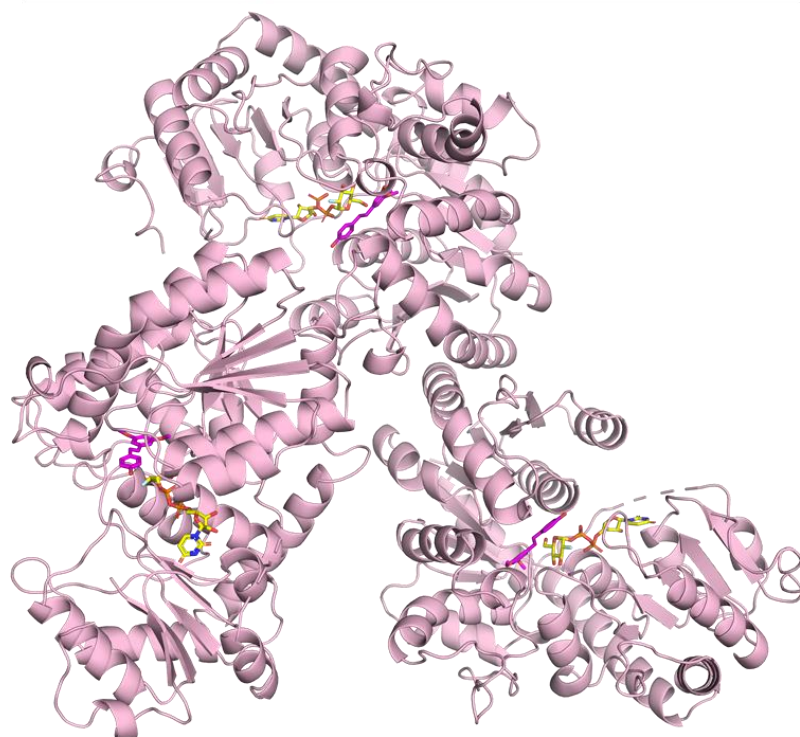

753

754 **S4. Structure of *PaGT2* complexed with substrates.** Overall structure of *PaGT2* with

755 UDP-2FGlc and (A) resveratrol and (B) pterostilbene in the asymmetric unit.

756

A.

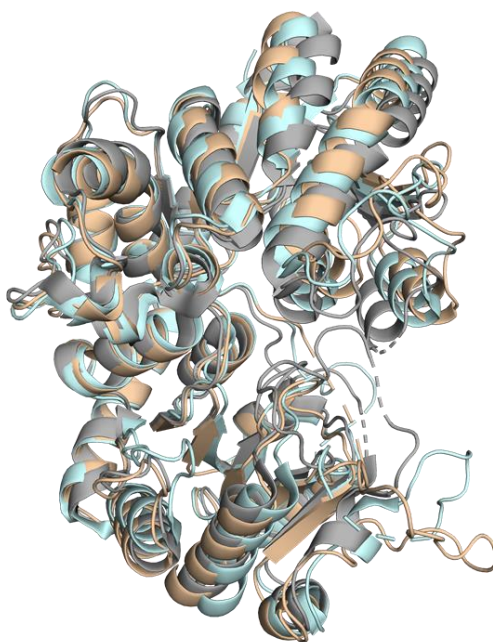

B.

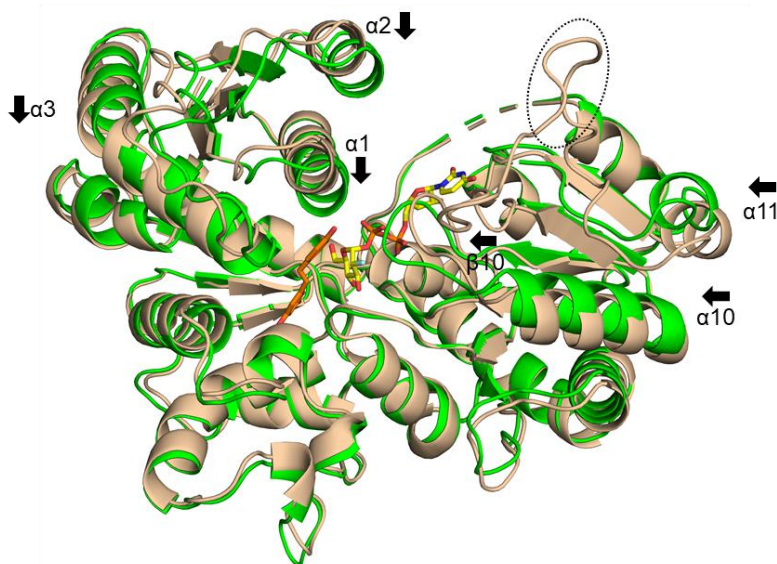

757

758 **S5. Comparison between other UGT, and *PaGT2* structures.** (A) Comparison of *PaGT2*

759 (light brown), UGT72B1 (grey) and *PtUGT1* (light-cyan). (B) Comparison of apo (light

760 brown) and *PaGT2* (green) with resveratrol (orange) and UDP-2FGlc (yellow). The loop that

761 causes dimerization of apo-*PaGT2* in crystal structure is indicated in black oval. The

762 distinctly shifted secondary structures after binding of substrates are labelled and indicated by

763 arrow heads.

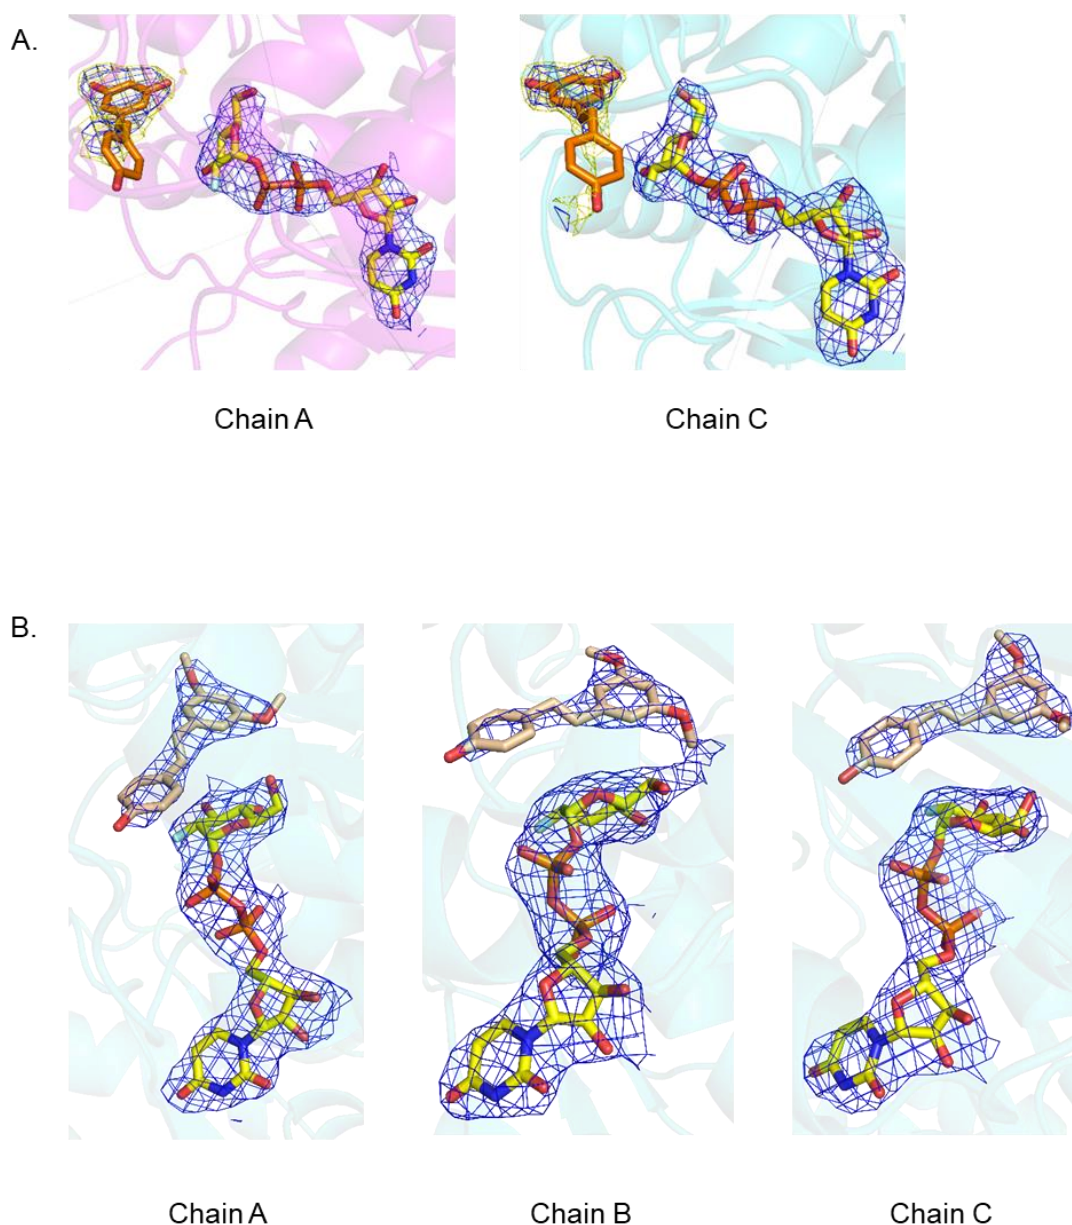

764

765 **S6. Observed electron densities of substrates.** (A) Sigma-A-weighted  $2Fo-Fc$  electron  
766 density maps contoured at  $1\sigma$  (blue) and  $0.7\sigma$  (yellow) for resveratrol and UDP-2FGlc. (B)  
767 Sigma-A-weighted  $2Fo-Fc$  electron density maps contoured at  $1\sigma$  for pterostilbene and UDP-  
768 2FGlc.

769

770

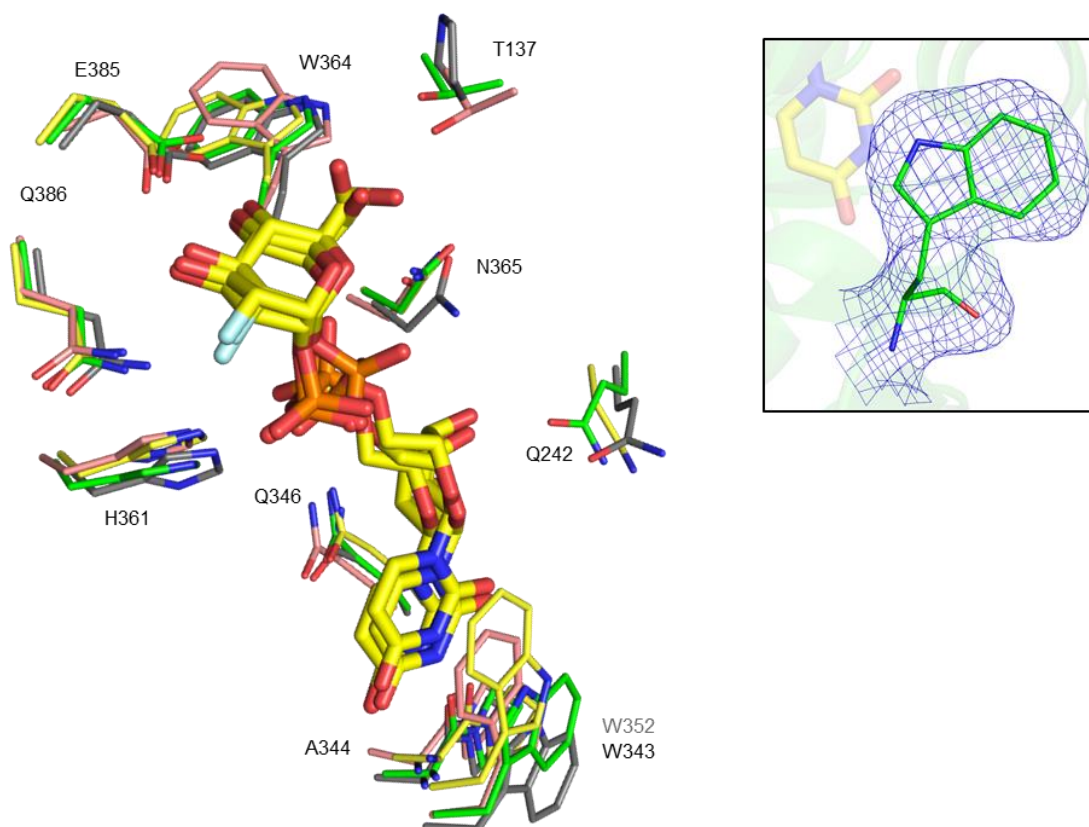

771

772 **S7. Comparison of donor binding in *PaGT2* with other UGTs.** Comparison of residues  
773 binding UDP-2FGlc (yellow) in *PaGT2* (green), *VvGT1* (pale red), *PtUGT1* (grey) and  
774 UGT71G1 (yellow) shows the UDP-glucose binding residues are highly conserved. Residue  
775 labels are corresponding to *PaGT2*. Indole ring of W343 is flipped and sidechain of Q242 is  
776 near to UDP-2FGlc in *PaGT2*. The crystal structure of *PtUGT1* (PDB ID: 5NLM) does not  
777 contain donor substrate, whose W352 (grey) has same orientation as the W343 of *PaGT2*.  
778 Sigma-A-weighted  $2F_o - F_c$  electron density map of W343 contoured at  $1.0\sigma$  (blue mesh) is  
779 shown in inset.

780

781

782



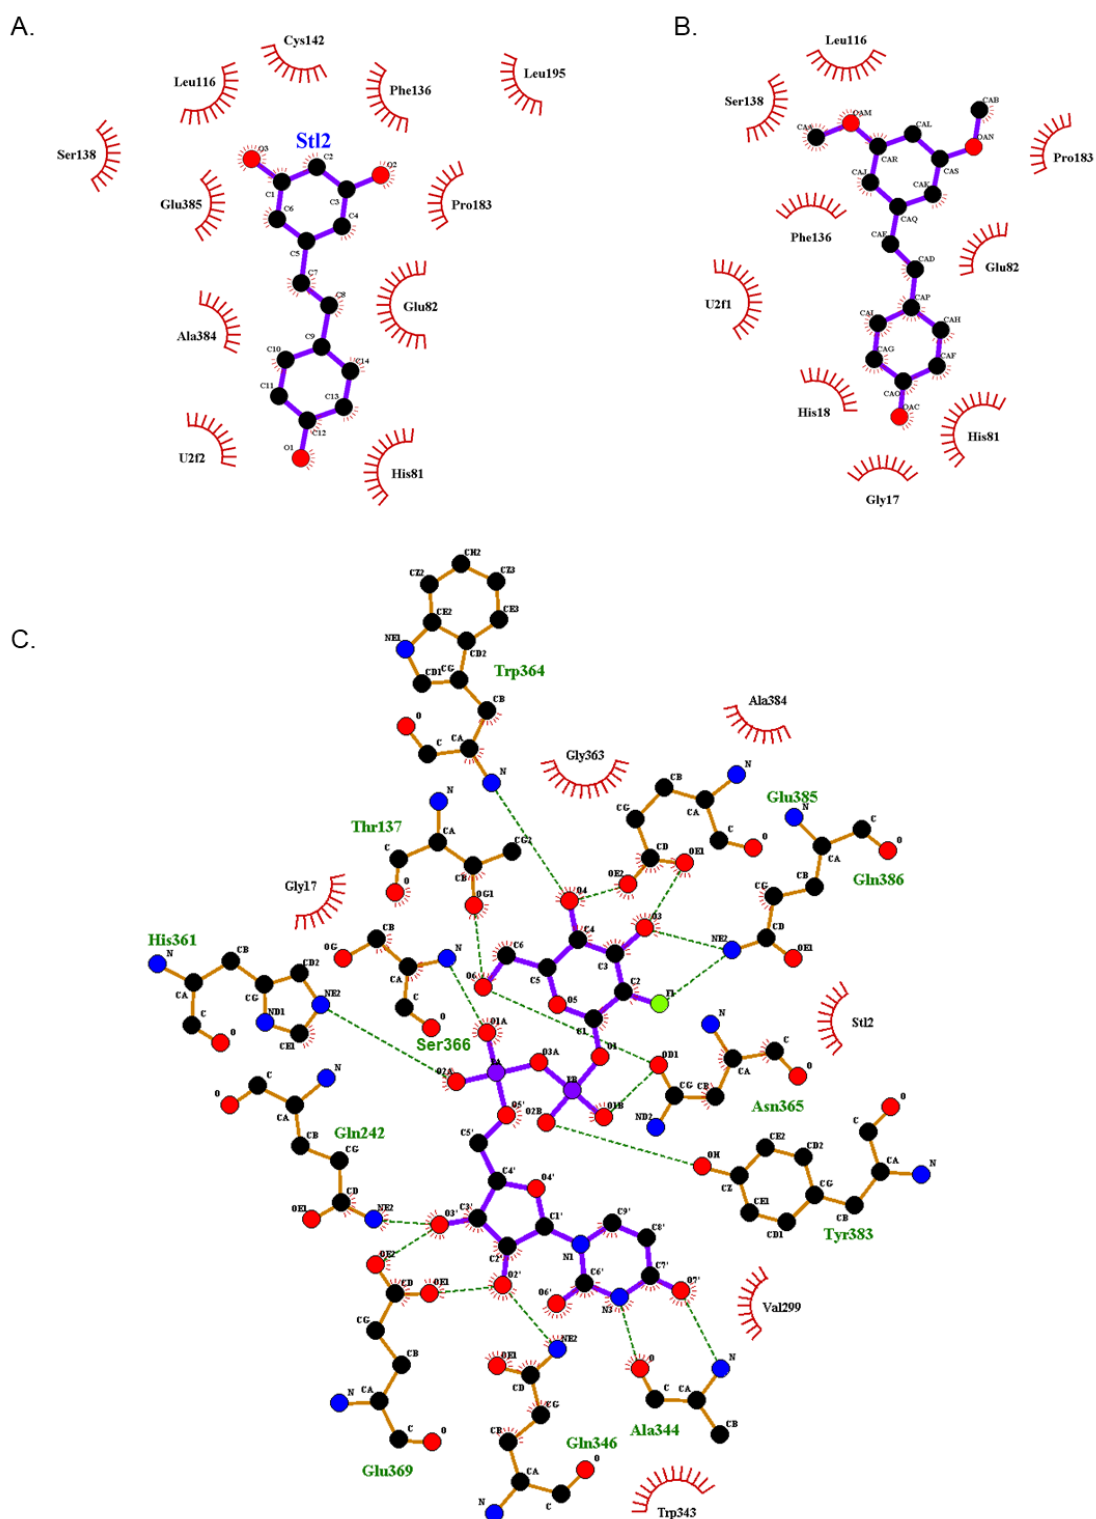

783

784 **S8. Interaction of *PaGT2* with substrates.** Interaction of *PaGT2* with (A) resveratrol, (B)  
785 pterostilbene and (C) UDP-2FGlc. The stilbene acceptors are stabilized mainly by  
786 hydrophobic interactions. These figures were drawn using LigPlot<sup>+</sup>.

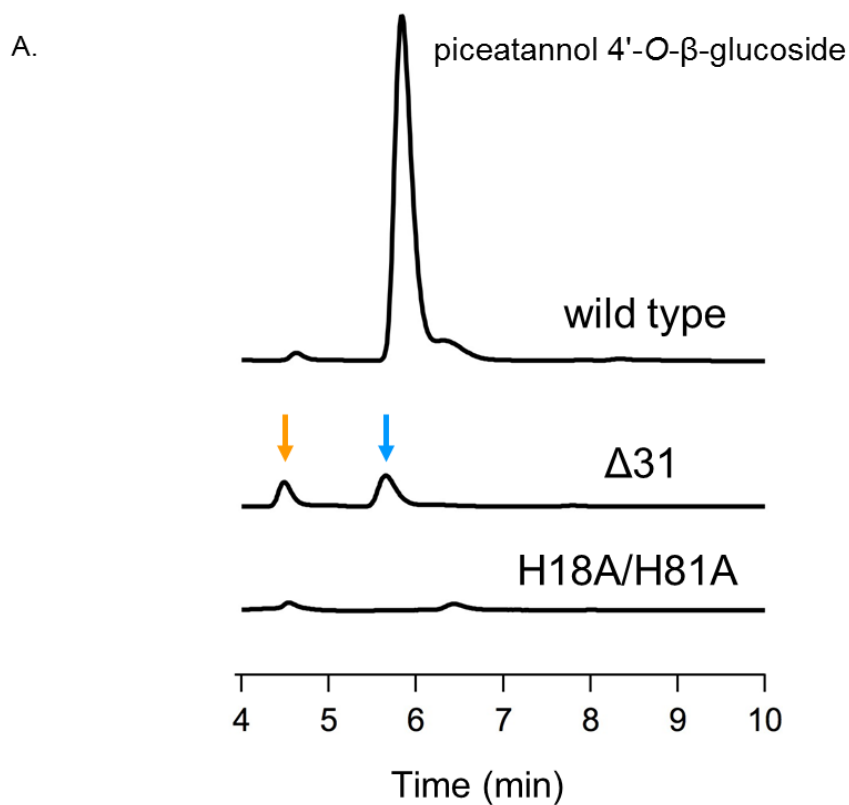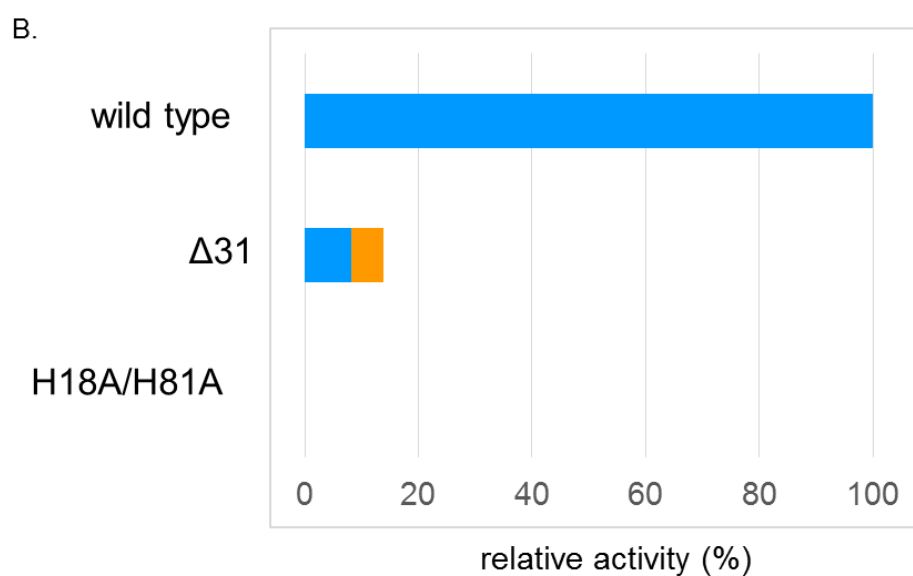

787

788 **S9. Glycosylation activity of *PaGT2*  $\Delta 31$ .** (A) HPLC profiles of piceatannol glucosylation.

789 (B) Comparison of the piceatannol glucosylation activity. Relative activity was calculated

790 based on the production of piceatannol 4'-O-glucoside (blue) and the side product (orange)

791 shown by arrows in (A).

**PaGT2** β1 α1 β2 00  
10 20 30 40 50  
**PaGT2** .....MEMEAPLIVIVPSPGMGHLIPLVEFAKVLVSRFHFVSVLLLPTTAQ.PTKA  
**UGT72B1** .....MEESKTPHVAIIPSPGMGHLIPLVEFAKRLVHLHGLTVTFVIAGEGP.PSKA  
**PtUGT1** GSESPAAPTAPPHTAPPVVIIVPSAGMGHLIPLAEFAKRLLP..RFVFAVPTSGP.PSSS  
**VvGT1** .....MSQTTTNPHVAVLAFPFSTHAAPELLAVVRLA...HAVFSFFSTSQSNASI  
**UGT71G1** .....MSMSDINKNSELIFIPAPGIGHLIASALEFAKLLTNHDK.NLYITVFCIKF.PGMP  
**UGT78K6** .....MKNKQHVAIFPFPFGSHLPLLNVLKLAHIAP.NTSFSFIGTHSSNAFL  
**UGT85H2** .....MGNFANRKHVVMIPYPVQGHINPLFLKLAHLHRLR.GFHTFVNTEYNH....  
**CsUGT7L12** .....MVQGHITLLLTFFPAQGHINPSLQFAKRLINM.GLQVTFATSVFAQ.RRIS  
**GmIF7GT** .....MKDITIVLYPNLGRGHLVSMVELGKLLTHHP.SLSITLILTP.PTTP

**PaGT2** α2 β3 η1 α3  
60 70 80  
**PaGT2** QTLLNLSLPSSVSHNFLP.....TVDPAHLDPDGVAH..EVTISL  
**UGT72B1** QRTVLDLSPSSISSVFLP.....PVDLTDLSSSTRI..ESRISL  
**PtUGT1** QRDFLSLSPASIDTSFLP.....EVDLSDAPSDAQI..ETLMSL  
**VvGT1** FHDSMHTMQCNIK...SYDISDGVPEGYVFAGR.....PQ...EDIE  
**UGT71G1** F.....ADSYIKSVLASQ...PQIQ...LIDLPEVEPPPQELLKSPFYL  
**UGT78K6** FTK..RHIPNNIR...VFTISDGIPEGHVPMANN.....PI...EKLD  
**UGT85H2** .KRLKSRGPKAFDFGFDNFESIPDGLTPMEGDDVSDVPTLCQSVRKNFLKPYCELL  
**CsUGT7L12** K.....TTGTTAKGLKFAAFSDGYDDGFQPGND...V.....QHKFSE  
**GmIF7GT** STTT.TTLACDSNAQYIATVTATT....PSIT...FHRVPLAALPFNTPLPPLLSSL

**PaGT2** α4 β4 η2 α5 β5  
90 100 110 120 130 140  
**PaGT2** THAH.SLSSIR.AALGSLAQQA.QVALITDLF...GTGLYTVARDLGFIPYLYFTSTIAM  
**UGT72B1** TVTR.SNPELR.KVFDSFVEGGRLPALVVDLF...GTDAFDVAVEFHVPPYIFYPTTAN  
**PtUGT1** MVVR.SLPSLR.DLIASYSASGRRAALVVDLF...ATDAIDVALELGIRPFIFFPSTAM  
**VvGT1** LFTRAAPESFRQGMVMAVAETGRPVSLVADAF...IWFADMAEMGVAWLFWTAGPN  
**UGT71G1** TFLESIPHVK.ATIKTI.L..SNKVVGLVLDFF...CVSMIDVGNFEGIPSYLFLTNSVVC  
**UGT78K6** LFLSTGPDNLRKGIELAVAEKQSVTCIADAF...VTSLLVAQTLNVPWIAFWPNVSC  
**UGT85H2** TRLNHST.....NVPPVTCLVSDCC...MSFTIQAAEFELVNPVLYFSSSAC  
**CsUGT7L12** IRIN.SSLAIR.EIIAASAAEGRPVTCLVYTL..LPWAAKVARDCIIPSA LLWIIPAT  
**GmIF7GT** ELTRHSTQNIA.VALQTLAK.ASNLKAIVIDFMNFNDPKALTENLNNNVPTYFYYSGAS

**PaGT2** α6 η3 β6 β7 η4 η5  
150 160 170 180  
**PaGT2** CLFLFHLPKLDDEVSC.EYRD.....MPEPLVLPFCVPLHGDVDPV...QDRQD  
**UGT72B1** VLSFFLHLPKLDDEVSC.EFRE.....LTEPLMLPGCVPVAGKDFLDPA...QDRKD  
**PtUGT1** TLSFFLHLEKLDDEVSC.EFAE.....LSDPVQIPGCIPVHGKDLIDPV...QDRKN  
**VvGT1** SLSTHVIIDEIREKIGVSGIQ.....GREDELLNFIIPGMSKVRFRDLQEG.IVFGNLN  
**UGT71G1** FLSLMLSLKNRQIEEVFDDSDR.....DHQLLNIPGISNOVPSNVLPDA...CFNKD  
**UGT78K6** SLSLNFNIDLIRDKCSK.....DAKNATLDFLPGLSKLRVDDVPQMLDVGKEKE  
**UGT85H2** SLSLNMHFRSFRVERGII.PFKDESylTNGCLETKVDWIPGLKFNRLKLDIVDFLIRTTNPD  
**CsUGT7L12** VLDIYYFYFNGYKEVITKNCNG.....KDSSSCSIEIPGLPLLTSHDLPVDFL...FSSSS  
**GmIF7GT** TALLLYYPTIHTPLIEKKDTD.....QPLQIQIPGLSTITADDFPNEC...KDPLS

**PaGT2** α7 η6 β8 α8 β9  
190 200 210 220 230 240  
**PaGT2** QAYHV...LLDHVKRY..VLAEGIFVYTFVDLEPGATKT.LQTEDPNVPPVYVVGPIIQS  
**UGT72B1** DAYKW...LLHNTKRY..KEAEGILVNTFFLEPNALIKALQEPGLDKPPVYVVGPIVNI  
**PtUGT1** DAYKW...LLHHSKRY..KLAEGIVVNSFEGLGGPIRELLHPEPGKPPVYVVGPIQA  
**VvGT1** SLFSRMLH...RMGQVL..PKATAVINSFEELEDDSLND.LKS..KLKTYLNIIGPNLI  
**UGT71G1** GGYIA...YYKLAERF..RDTKGIIVNTFSDLEQSSIDALYDHDEKIPPIYAVGPILDL  
**UGT78K6** TLFSRTLN...SLGVVL..PQAKAVVNFFAELDPPFLVVKYMRS..KLQSLLYVVPVPCP  
**UGT85H2** IMLF...FIEVADRV..NKDITILLNTFNELESDVINALSS...TIPSIYPIGPIPSL  
**CsUGT7L12** DIYSLSLPTFKHEIETLDAETS PKVIVNTFDALPEGLKAIIGK...YNLIGIPIPLIPS  
**GmIF7GT** YACQV...FLQIAETM..MGGAGIIVNTFEAIEEAIIRALSEDA TVPPP LFCVGPVISA

**PaGT2** α9 β10 α10  
250 260 270 280  
**PaGT2** GLDD.....D..SHGSDCLRWLDRQPSGSVLFVSVFSGSGGT..LSNEQLNELAIG  
**UGT72B1** GKQE.....AKQTEESECLRWLDNQPLGSVLYVSVFSGSGGT..LTCEQLNELALG  
**PtUGT1** GSCE.....KGAARPECLRWLDQQPRGSVLFVSVFSGSGGT..LSTEQNELAGV  
**VvGT1** TPPP.....VPNTTGCLRWLKERKPTSVVYISFGTVTT...PPPAEVVALSEA  
**UGT71G1** KGQPNP.....KLDQAQHDLLIKWLDEQPDKSVVFLCFSGSMGV.SFGPSQIREIALG  
**UGT78K6** QLLLP.....EIDSNGCLSWLDSKSSRSVAVVCFGTVVV...PPPQEVVAVAE  
**UGT85H2** LKQFPQIHQLDLSLNLWKEDTECLDWLESKEPGSVVYVNFSGSTTV..MTPEQLLEFAWG  
**CsUGT7L12** VFLDGKDPSTSFKGLDFHASGNYIBWLSKPKSVVYVSVFSGSLLVLPMPKRQMEIIGRG  
**GmIF7GT** PYGE.....EDKGCISWLNQPSQSVVLLCFSGSMGR..FSRAQLKEIATIG

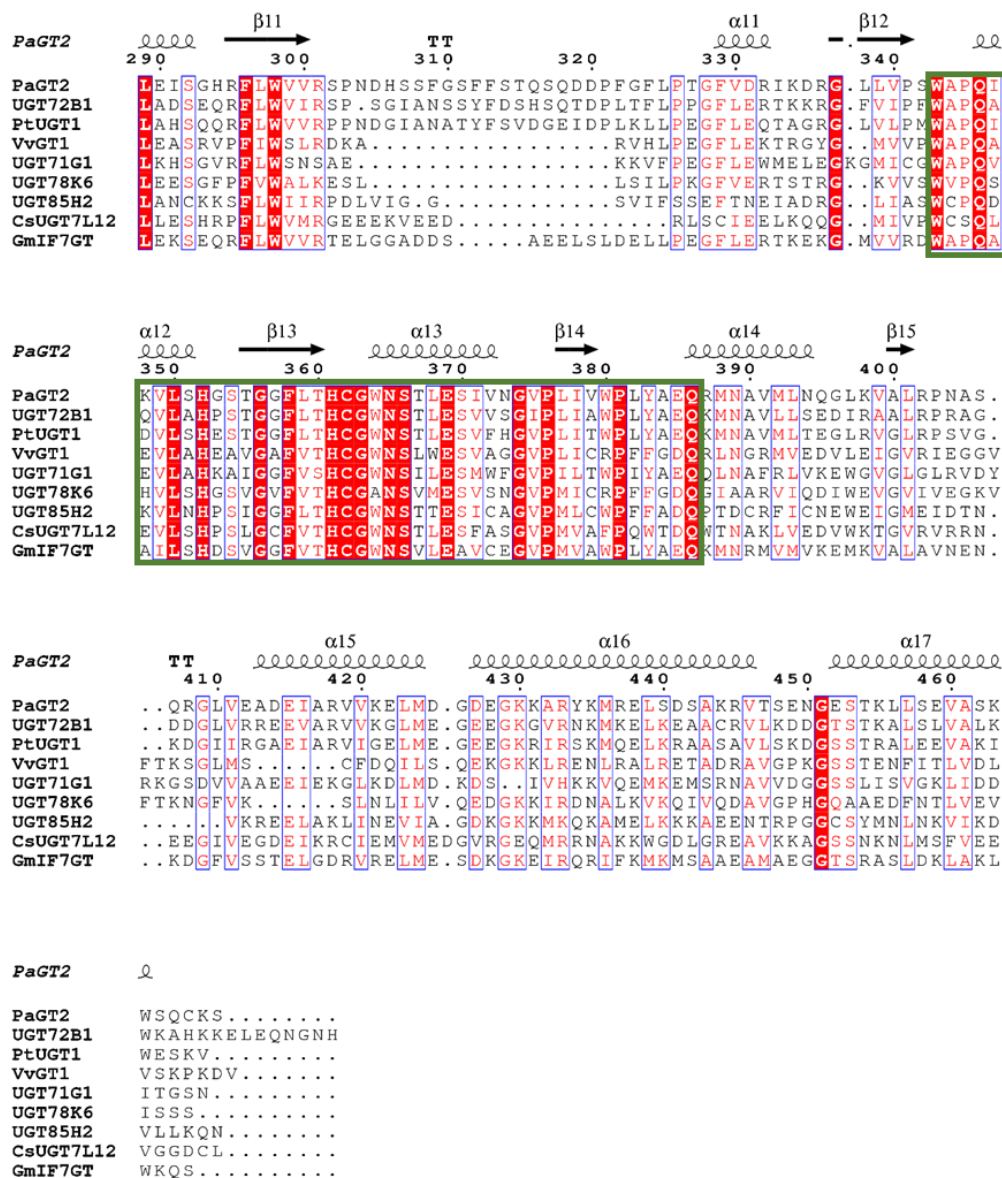

793

794 **S10. Sequence alignment of PaGT2 with other UGTs.** Multiple sequence alignment of  
795 PaGT2 amino acid sequence with other plant glycosyltransferases UGT72B1 (*Aradopsis*  
796 *thaliana*), PtUGT1 (*P. tinctorium*), VvGT1 (*Vitis vinifera*), UGT71G1 (*Medicago truncatula*),  
797 UGT78K6 (*C. ternatea*), UGT85H2 (*Medicago truncatula*), CsUGT75L12 (*Camellia*  
798 *sinensis*) and GmIF7GT (*G. max*). PSPG motif is indicated by green lined box. Highly  
799 conserved residues are highlighted in red, well conserved residues are red colored. The  
800 conserved catalytic histidine (His18) is indicated with red \*, the alternative catalytic histidine  
801 (His81) is indicated with green \* and Cys142 is indicated with black \*. This figure is drawn  
802 by using ESPript 3.0 (3)

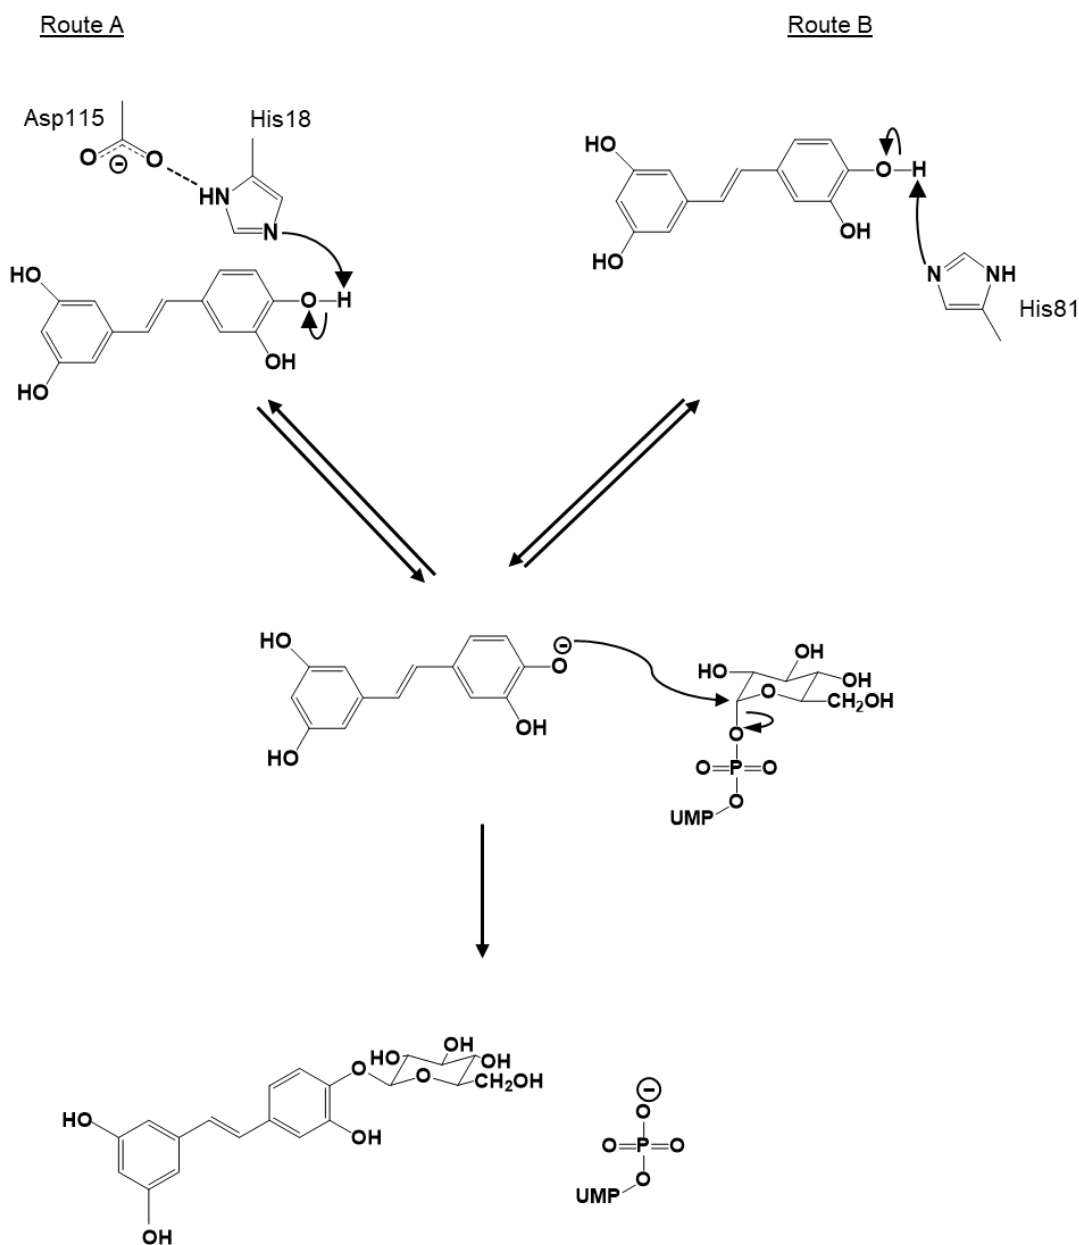

803

804 **S11. The proposed glucosylation mechanisms in PaGT2.** The possible mechanism of  
805 piceatannol glucosylation by PaGT2. Piceatannol anion necessary for attack on C1 carbon of  
806 UDP-glucose can be generated in two different ways (A) by the catalytic pair His18 and  
807 Asp115 (B) by His81.
